# Supplementary material for: Pharmaceutical salts to improve diffusion permeability of a BCS class III β-blocker drug atenolol
Source: Royal Society of Chemistry journal article supplement (doi:10.1039/d4ce01003e), 2024-01-01
Supplement: d4ce01003e1.pdf [file d4ce01003e1.pdf]

## Supporting Information

### Pharmaceutical Salts to Improve Diffusion Permeability of a BCS class III $\beta$ -blocker Drug Atenolol

Daliya K. Shajan,<sup>a</sup> Noopur Pandey,<sup>b</sup> Animesh Ghosh,<sup>b</sup> Anubha Srivastava,<sup>c</sup> Palash Sanphui<sup>\*,a</sup>

<sup>a</sup>Department of Chemistry, Faculty of Engineering and Technology, SRM Institute of Science and Technology, Kattankulathur, Tamil Nadu 603203, India. E-mail: palashi@srmist.edu.in

<sup>b</sup>Solid State Pharmaceutics Research Laboratory, Department of Pharmaceutical Sciences & Technology, Birla Institute of Technology, Mesra, Ranchi - 835215, Jharkhand, India

<sup>c</sup>Department of Physics, University of Lucknow, University Road, Lucknow 226007, Uttar Pradesh, India.

## Table of contents

|                                                                                               |  |
|-----------------------------------------------------------------------------------------------|--|
| Table S1. Hydrogen bond geometry of ATL salts.....                                            |  |
| Table S2. Distribution coefficients of ATL and its salts.....                                 |  |
| Figure S1. Hydrogen bond in ATL and ATL-succinate salt .....                                  |  |
| Figure S2. PXRD comparison of ATL salts with ATL and coformer acids.....                      |  |
| Figure S3. PXRD comparison of ATL-FUM/ADP salts with their calculation X-ray patterns.....    |  |
| Figure S4. Vibrational frequencies comparison of ATL salts with ATL and acidic coformers..... |  |
| Figure S5. DSC -TGA thermograms of ATL salt hydrates.....                                     |  |
| Figure S6. PXRD comparison of ATL and its salts after solubility experiments.....             |  |
| Figure S7. PXRD comparison of ATL and its salts after 6h diffusion.....                       |  |
| Figure S8. PXRD comparison of ATL and its salts against humidity conditions.....              |  |
| Figure S9. PXRD comparison of ATL and its salts against 50 °C (1h).....                       |  |

**Table S1.** Hydrogen bond geometry (Å, °)

|                 | D-H...A        | D-H/ Å | H...A/Å   | D...A/Å   | D-H...A/° | Symmetry code   |
|-----------------|----------------|--------|-----------|-----------|-----------|-----------------|
| ATL-FUM hydrate | N1-H1A...O4    | 0.86   | 2.04      | 2.8269(1) | 151       | x,3/2-y,1/2+z   |
|                 | N1-H1B...O1    | 0.86   | 2.25      | 3.0165(1) | 149       | -x,-1/2+y,1/2-z |
|                 | N2-H2A...O4    | 0.90   | 1.83      | 2.7338(1) | 179       | 1-x,1-y,-z      |
|                 | N2-H2B...O3    | 0.90   | 1.96      | 2.8280(1) | 160       | 1-x,1-y,-z      |
|                 | O3-H3...O5     | 0.84   | 1.78      | 2.6224(1) | 174       | 1-x,1-y,-z      |
|                 | O6-H6A...O5    | 0.84   | 2.06      | 2.8942(1) | 177       | -               |
|                 | O6-H6B...O1    | 0.87   | 2.01      | 2.8082    | 176       | x,-1+y,z        |
|                 | C4-H4...O5     | 0.92   | 2.52      | 3.3875(1) | 155       | x,1+y,z         |
| ATLA DP hydrate | N1-H1A...O4    | 0.86   | 2.23      | 3.0801(3) | 170       | 1-x,1-y,-z      |
|                 | N1-H1B...O3    | 0.86   | 2.17      | 2.9958(3) | 162       | -1+x,y,Z        |
|                 | N2-H2A...O14   | 0.89   | 1.94      | 2.7738(2) | 156       | 2-x,1/2+y,1/2-z |
|                 | N2-H2B...O15   | 0.89   | 1.90      | 2.7575(2) | 162       | -               |
|                 | O3-H3...O13    | 0.82   | 1.85      | 2.6626(2) | 173       | --              |
|                 | N3-H3A...O10   | 0.86   | 2.24      | 3.0802(3) | 164       | 2-x,1-y,-z      |
|                 | N3-H3B...O9    | 0.86   | 2.18      | 2.9943(3) | 158       | -               |
|                 | N4-H4A...O20   | 0.89   | 1.94      | 2.7920(2) | 160       | 1+x,y,z         |
|                 | N4-H4B...O17   | 0.89   | 1.87      | 2.7428(2) | 168       | -               |
|                 | N5-H5A...O6    | 0.86   | 2.14      | 2.9633(3) | 160       | 2-x,1-y,-z      |
|                 | N5-H5B...O1    | 0.86   | 2.04      | 2.8829(3) | 168       | -               |
|                 | O6-H6...O18    | 0.82   | 1.80      | 2.6202(2) | 173       | 1+x,y,z         |
|                 | N6-H6A...O13   | 0.89   | 1.90      | 2.7569(2) | 162       | 2-x,1/2+y,1/2-  |
|                 | N6-H6B...O16   | 0.89   | 1.95      | 2.7843(2) | 156       | 2-x,1/2+y,1/2-  |
|                 | N7-H7A...O4    | 0.86   | 2.15      | 2.9685(3) | 160       | 1-x,2-y,-z      |
|                 | N7-H7B...O12   | 0.86   | 2.02      | 2.8506(3) | 163       | -1+x,y,z        |
|                 | N8-H8A...O18   | 0.89   | 1.89      | 2.7617(2) | 168       | 1-x,1/2+y,1/2-  |
|                 | N8-H8B...O19   | 0.89   | 1.90      | 2.7548(2) | 161       | 2-x,1/2+y,1/2-  |
|                 | O9-H9...O15    | 0.82   | 1.82      | 2.6339(2) | 172       | 2-x,1/2+y,1/2-  |
|                 | O12-H12A...O20 | 0.82   | 1.90      | 2.7178(2) | 176       | 2-x,1/2+y,1/2-  |
|                 | O21-H21A...O14 | 0.85   | 2.06      | 2.7595(2) | 139       | -               |
|                 | O21-H21B...O24 | 0.85   | 1.96      | 2.7762(2) | 161       | 1+x,y,z         |
|                 | O22-H22A...O22 | 0.85   | 1.93      | 2.7782(2) | 175       | 2-x,-1/2+y,1/2  |
|                 | O22-H22B...O24 | 0.85   | 1.89      | 2.7384(2) | 172       | -               |
| O23-H23C...O21  | 0.85           | 2.07   | 2.7722(2) | 140       | -         |                 |
| O24-H24A...O17  | 0.85           | 2.00   | 2.7838(2) | 154       | -         |                 |
| O24-H24B...O23  | 0.85           | 1.89   | 2.7340(2) | 170       | -         |                 |

**Table S2.** Calculation of Distribution Coefficients of ATL and its salts

| Salts   | $C_w$<br>(mg/mL) | $C_0$<br>(mg/mL) | $C_E$<br>(mg/mL) | $C_{\text{initial}} - C_E$<br>(mg/mL) | $\text{Log}(C_0/C_w)$ | $\text{Log}((C_{\text{initial}} - C_E)/C_E)$ |
|---------|------------------|------------------|------------------|---------------------------------------|-----------------------|----------------------------------------------|
| ATL     | 1.035            | 0.3442           | 0.9041           | 0.1309                                | -0.47                 | -0.83                                        |
| ATL-ADP | 0.8869           | 0.3945           | 0.6590           | 0.2279                                | -0.351                | -0.461                                       |
| ATL-FUM | 0.8150           | 0.5426           | 0.6647           | 0.1503                                | -0.176                | -0.645                                       |
| ATL-GLU | 0.8084           | 0.4813           | 0.5646           | 0.2438                                | -0.22                 | -0.364                                       |
| ATL-MAL | 0.7833           | 0.3817           | 0.4954           | 0.2879                                | -0.312                | -0.23                                        |
| ATL-OXA | 0.7786           | 0.4165           | 0.4915           | 0.2865                                | -0.271                | -0.234                                       |
| ATL-PIM | 0.7291           | 0.4134           | 0.4734           | 0.2557                                | -0.251                | -0.267                                       |

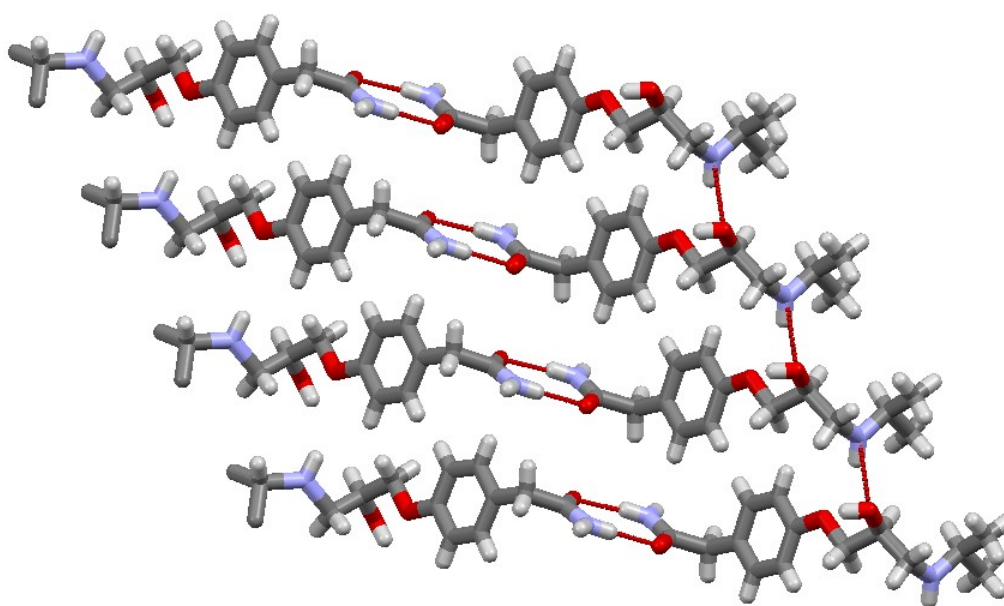

(a)

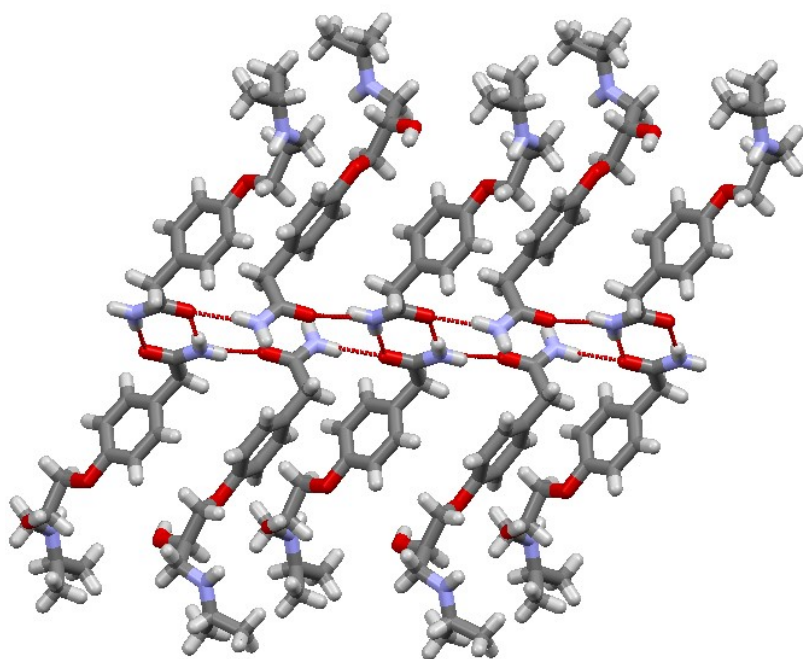

(b)

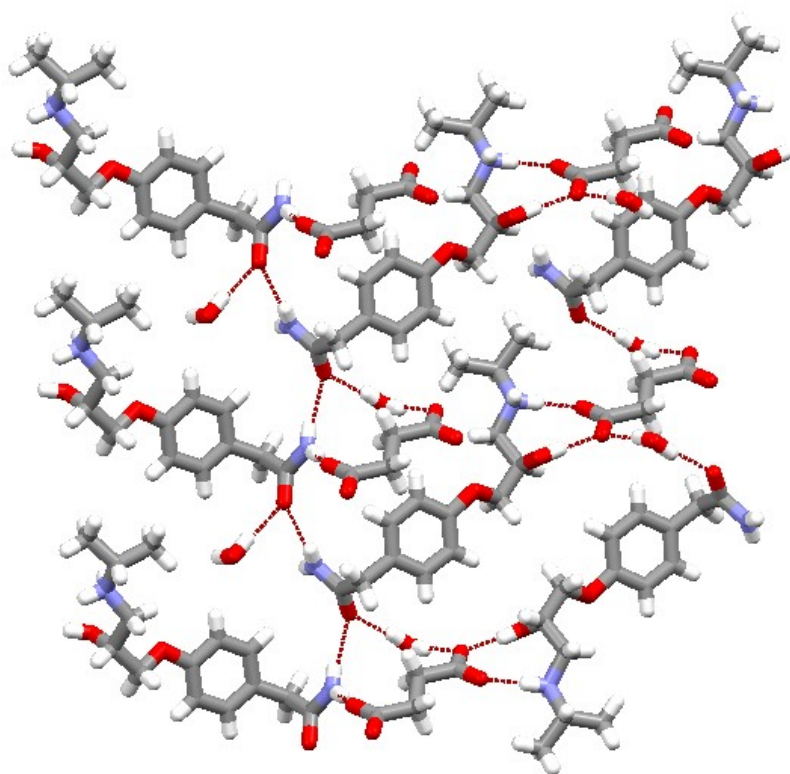

(c)

**Figure S1.** Hydrogen bonded amide dimer in a) S-ATL and b) RS ATL. c) ATL-succinate salt hydrate represents proton transfer from succinic acid to ATL, while amide fractions involved in catemer hydrogen bonds.

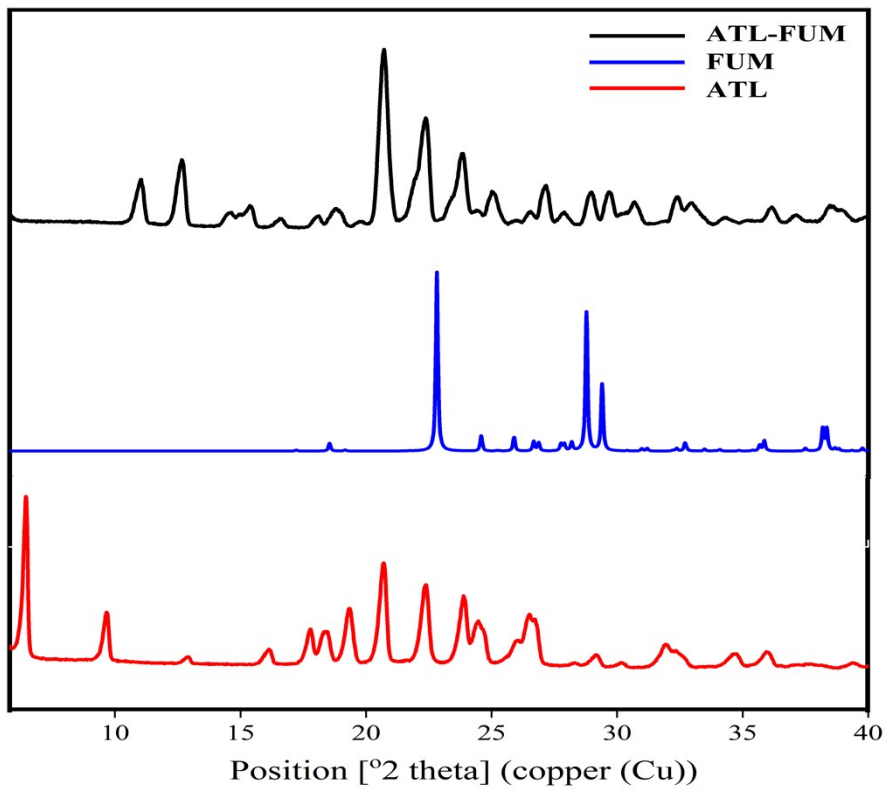

(a)

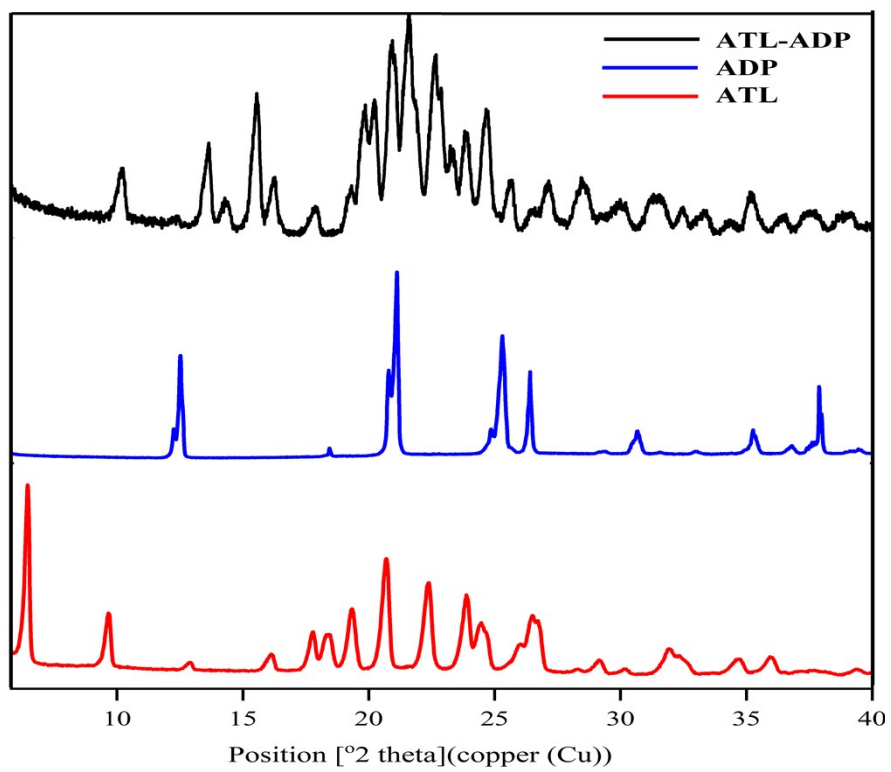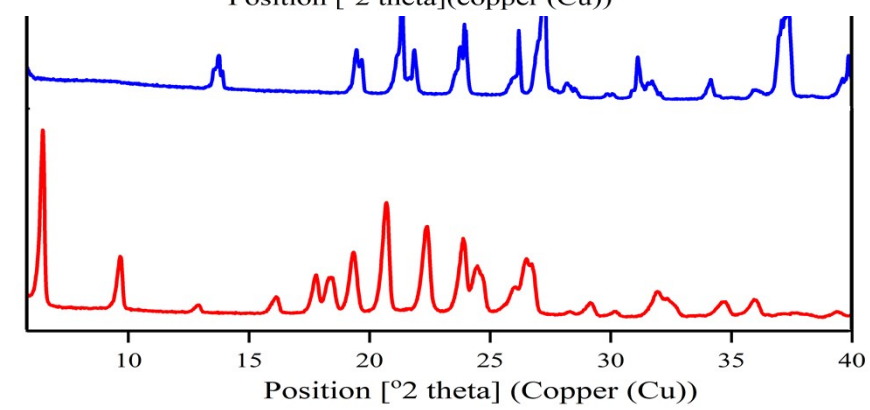

(c)

(c)

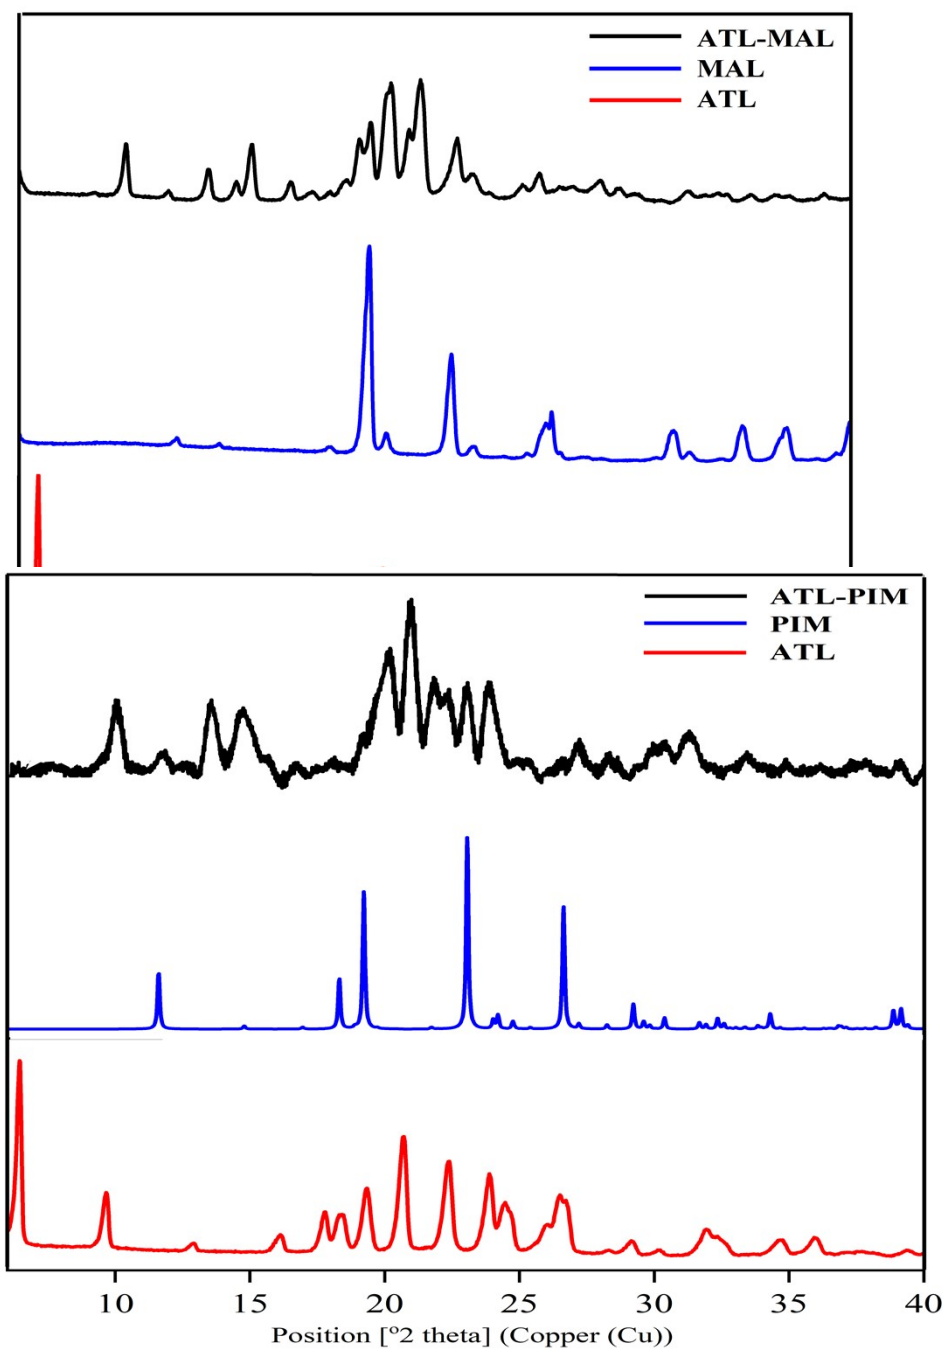

(e)

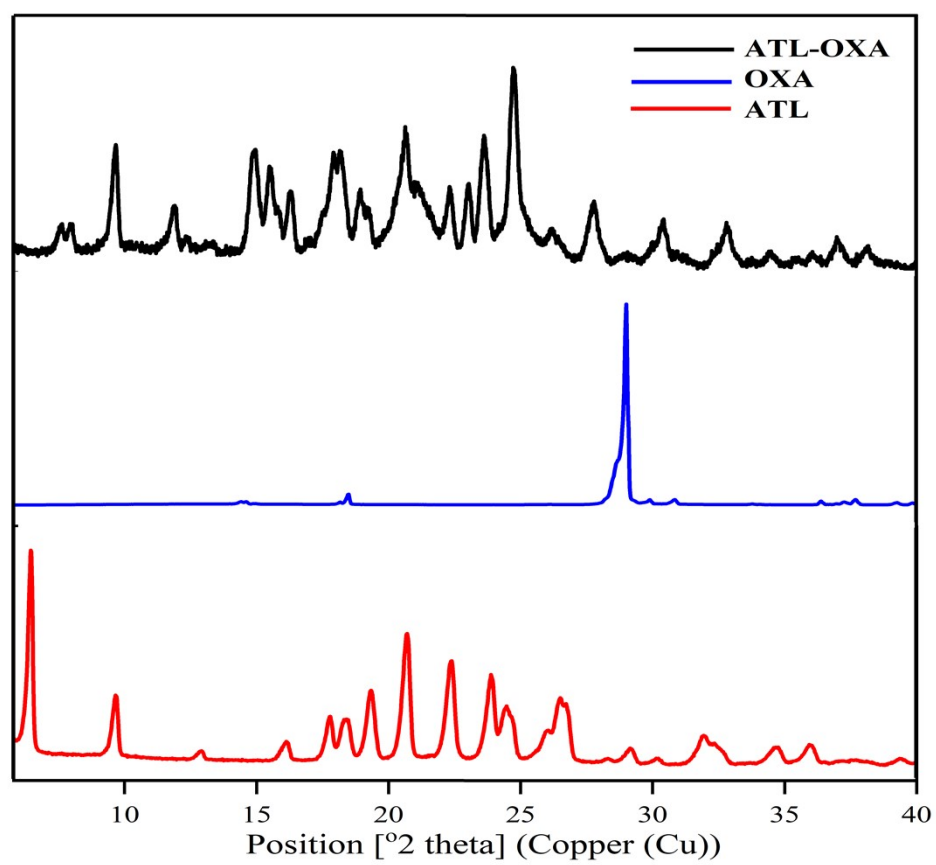

(f)

**Figure S2.** PXRd comparison of (a-f) ATL salts with that of ATL and salt former confirm their distinct phase

(a)



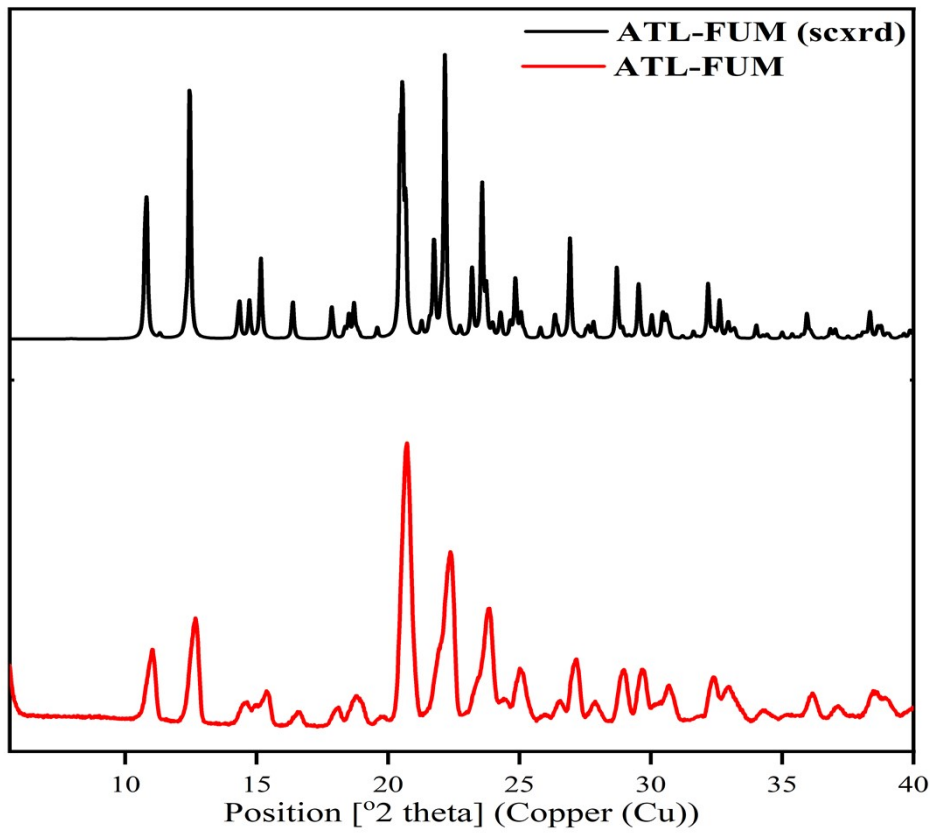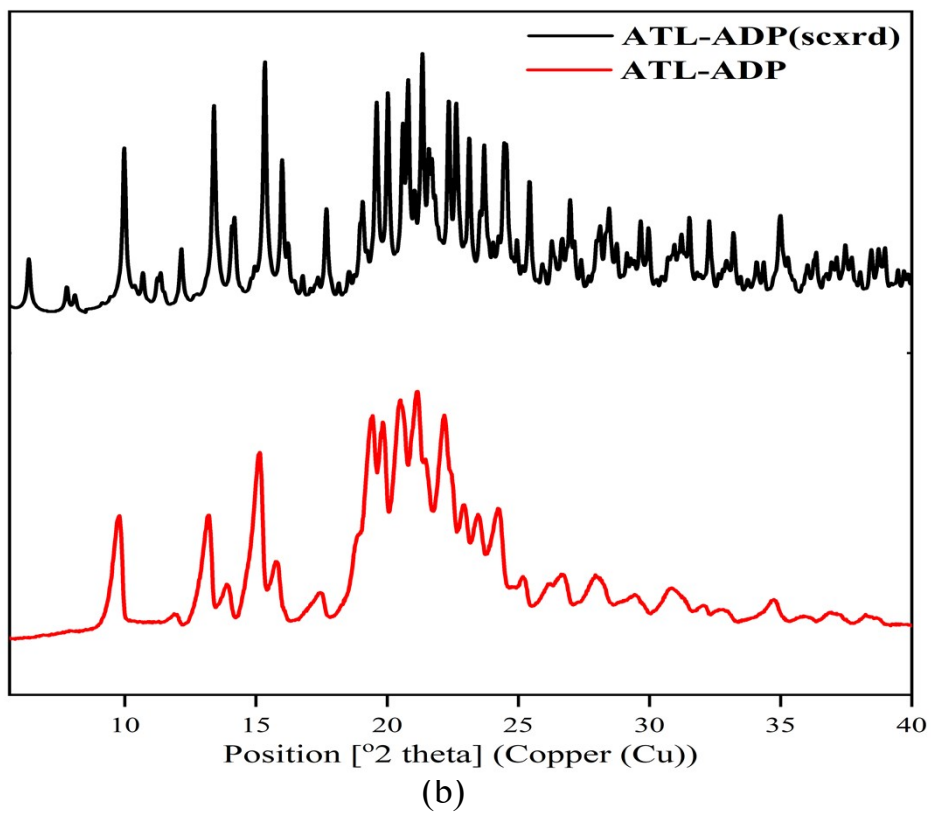

**Figure S3.** Comparison of PXRD pattern of a) ATL-FUM, b) ATL-ADP with the calculated X-ray pattern from their crystal structures confirmed purity of the bulk phase. Note, slight deviation of ATL-ADP hydrate in the XRD patterns compared to its crystal structure pattern indicates instability of the phase.

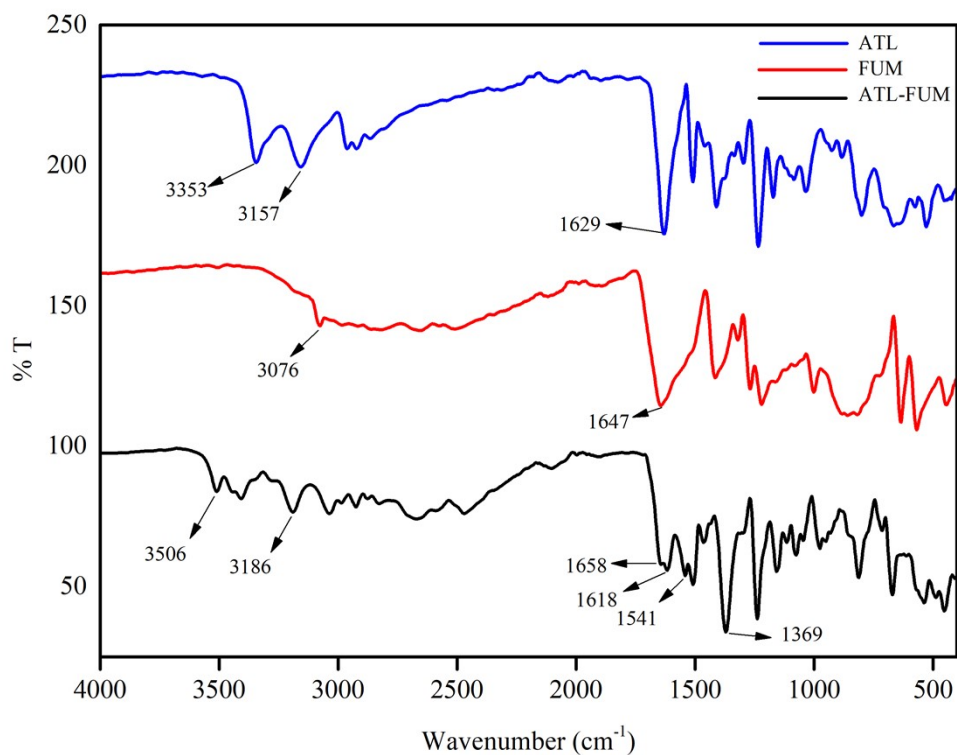

(a)

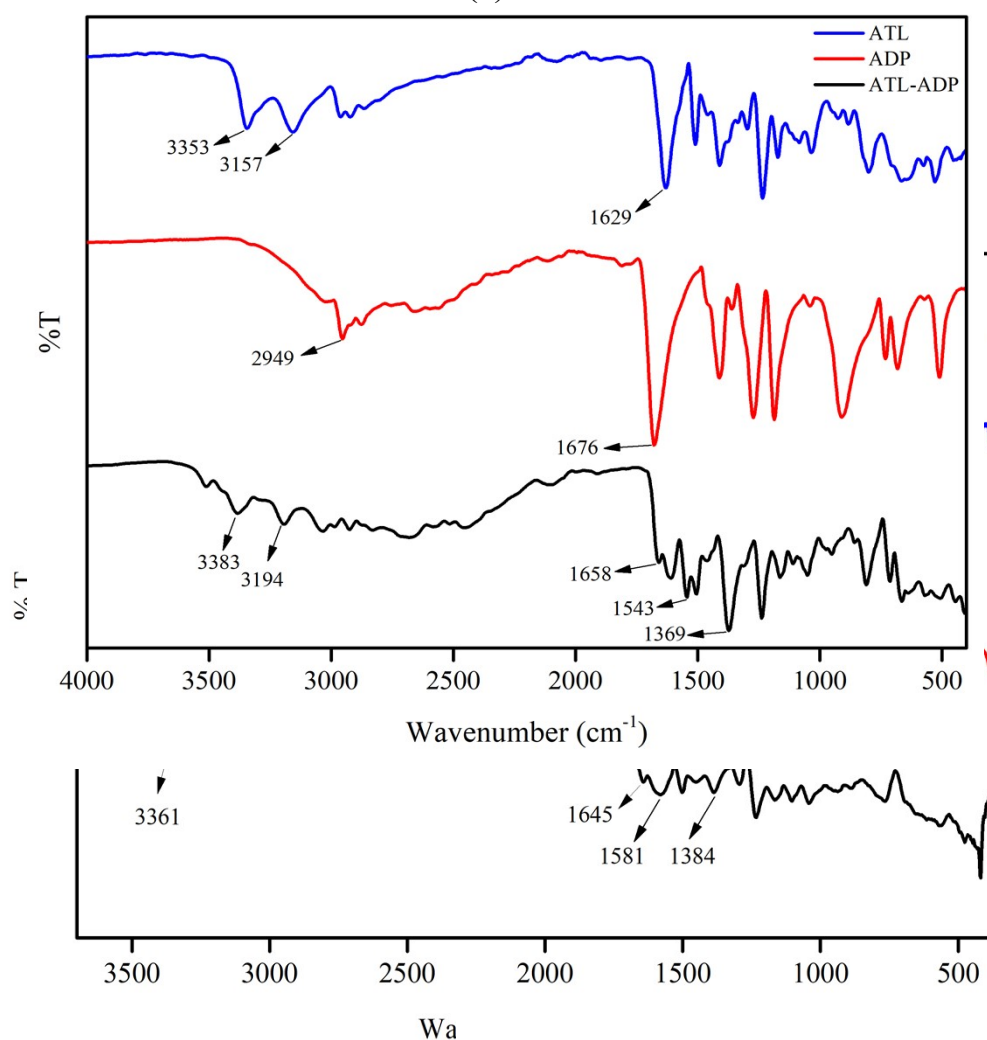

(c)

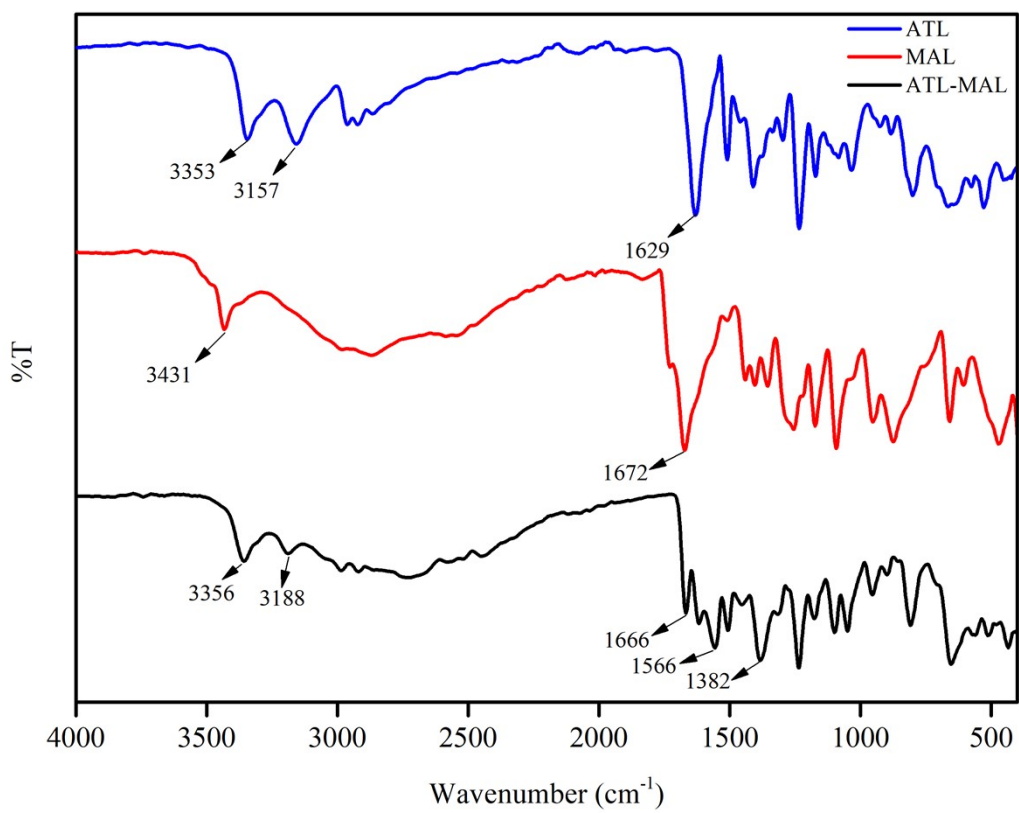

(d)

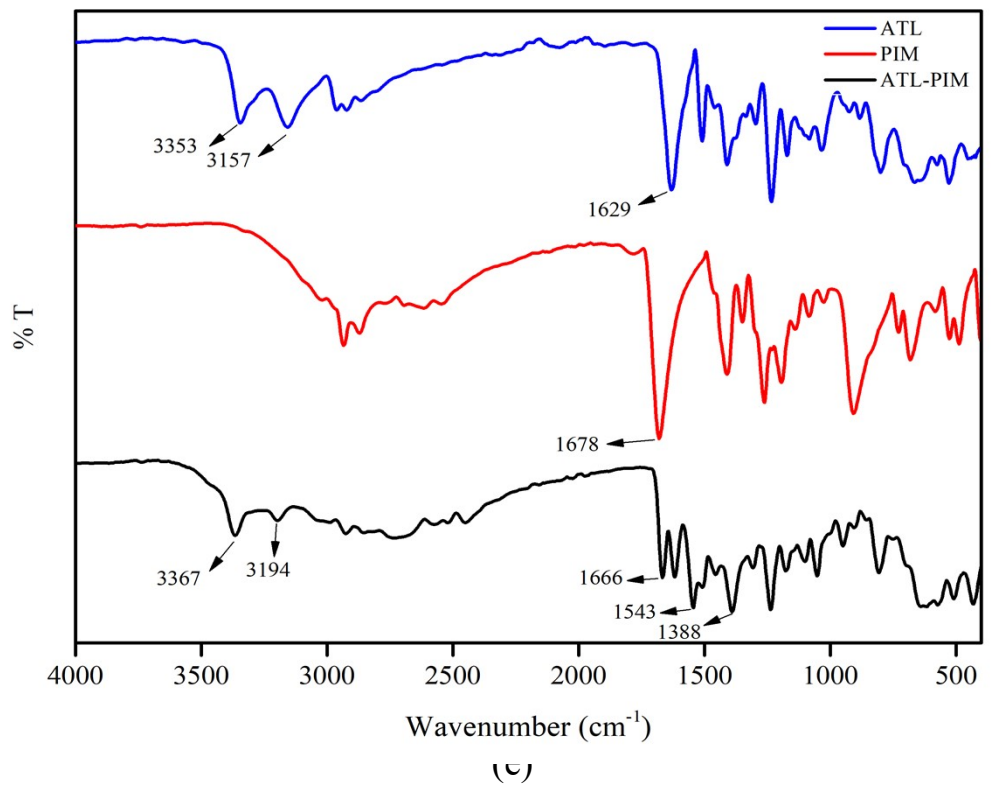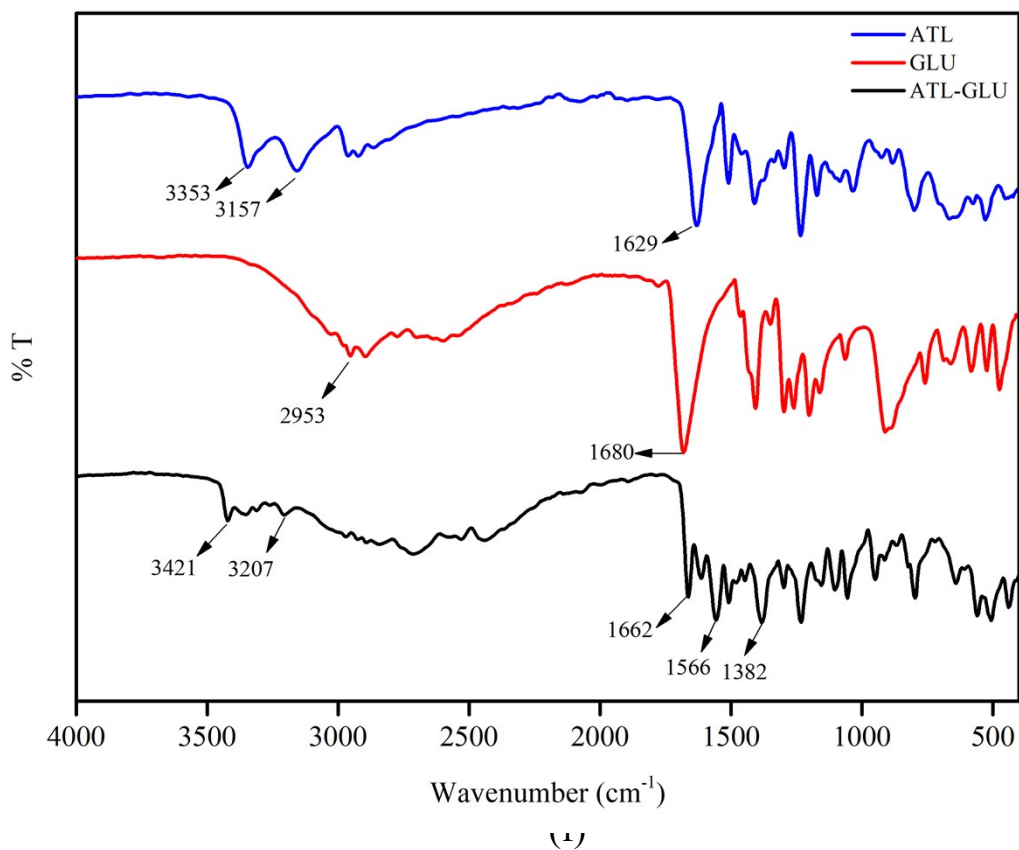

**Figure S4.** Vibrational frequencies comparison of ATL salts with ATL and salt formers (a-f).

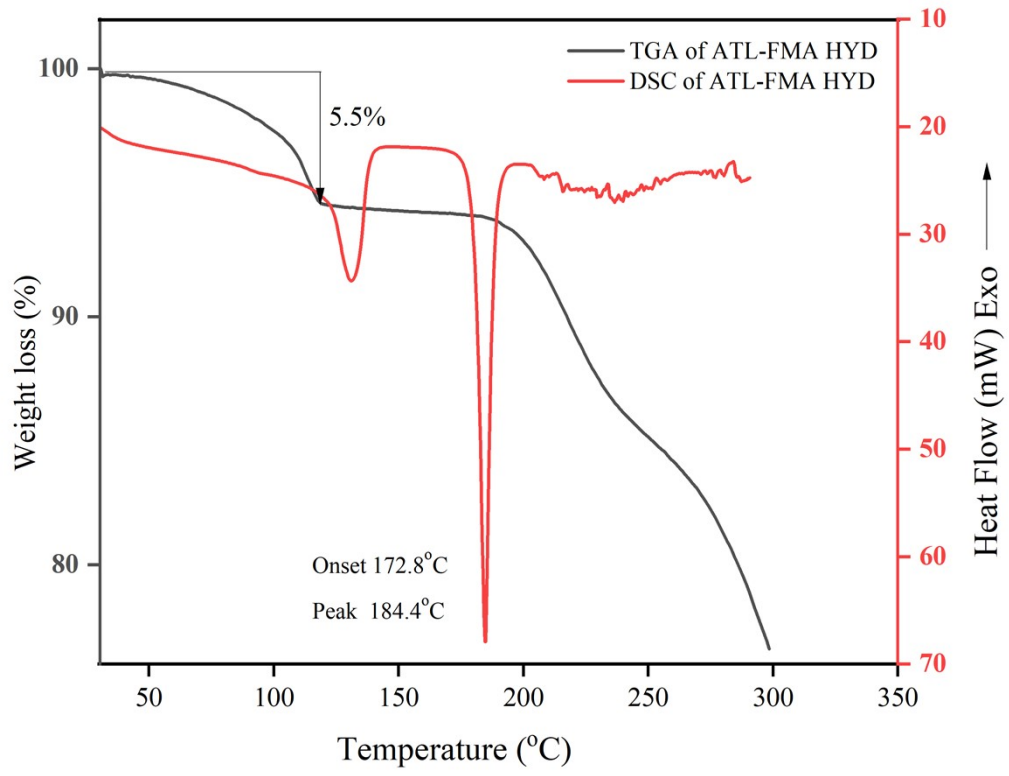

(a)

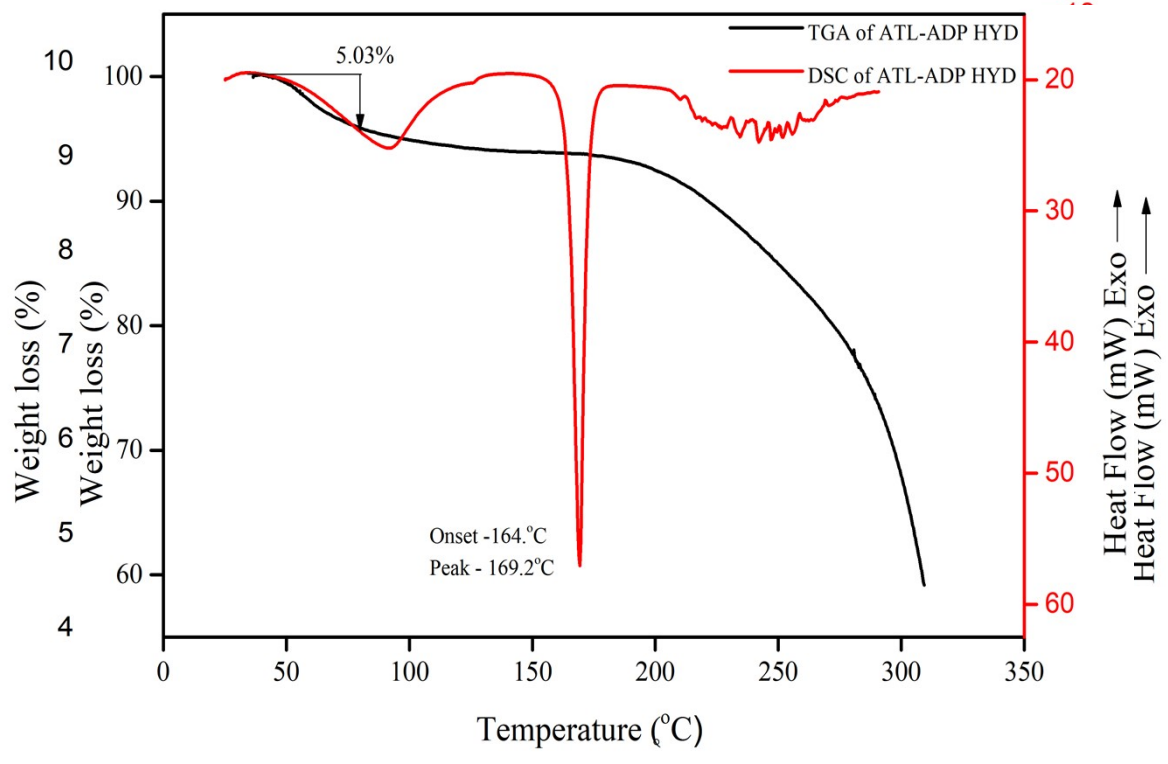

(b)

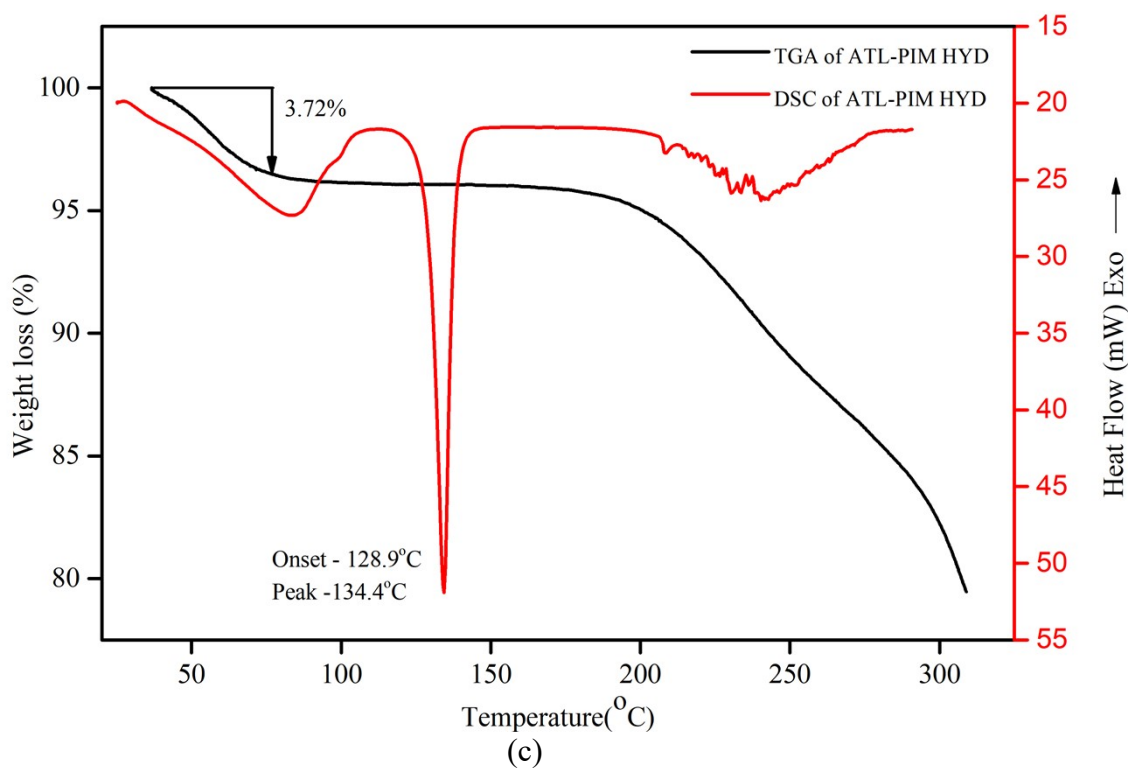

(d)

**Figure S5.** DSC -TGA thermograms of a) ATL-FUM, b) ATL-ADP, c) ATL-OXA, d) ATL-PIM salt hydrates.

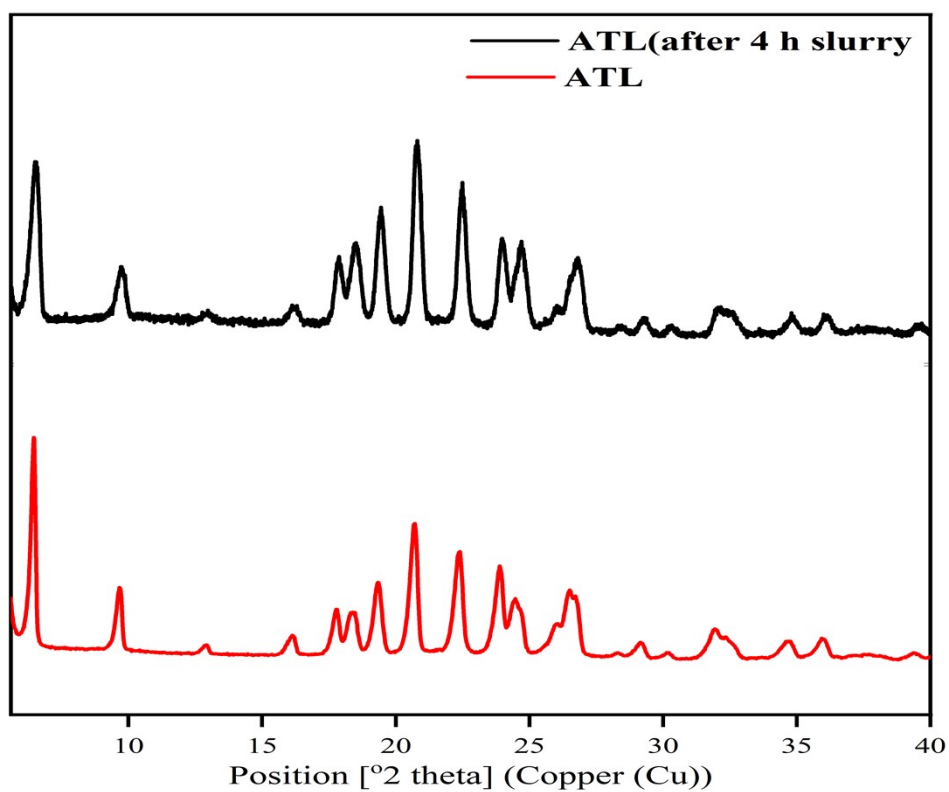

(a)

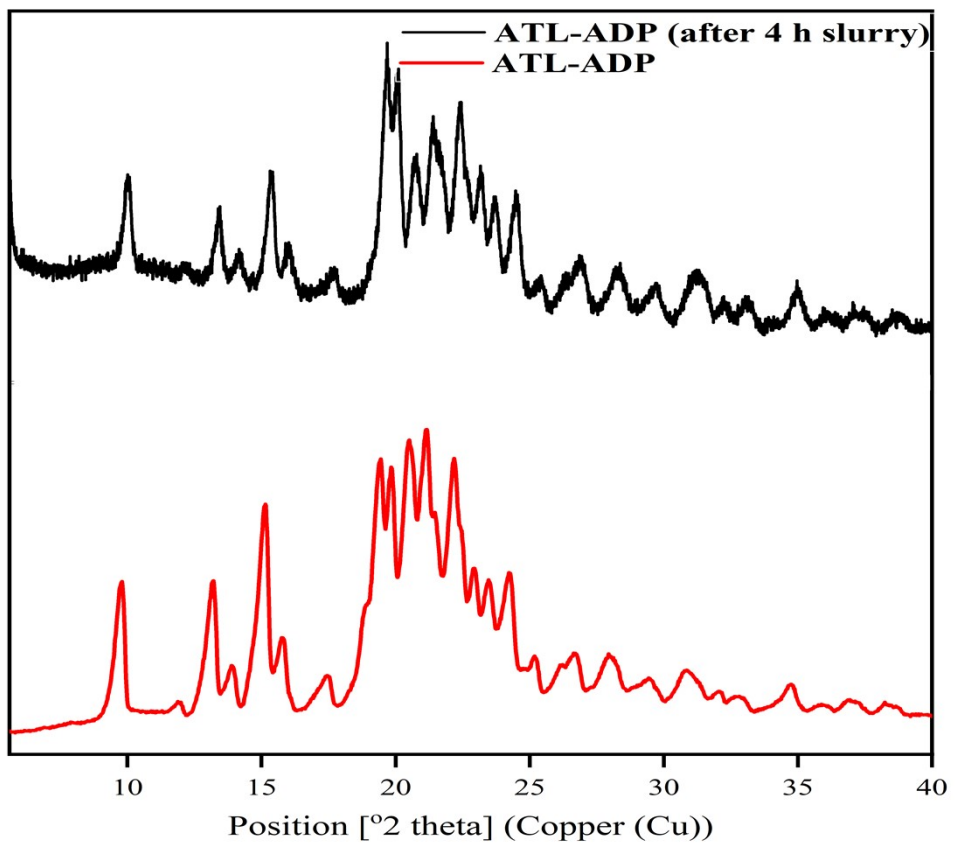

(b)

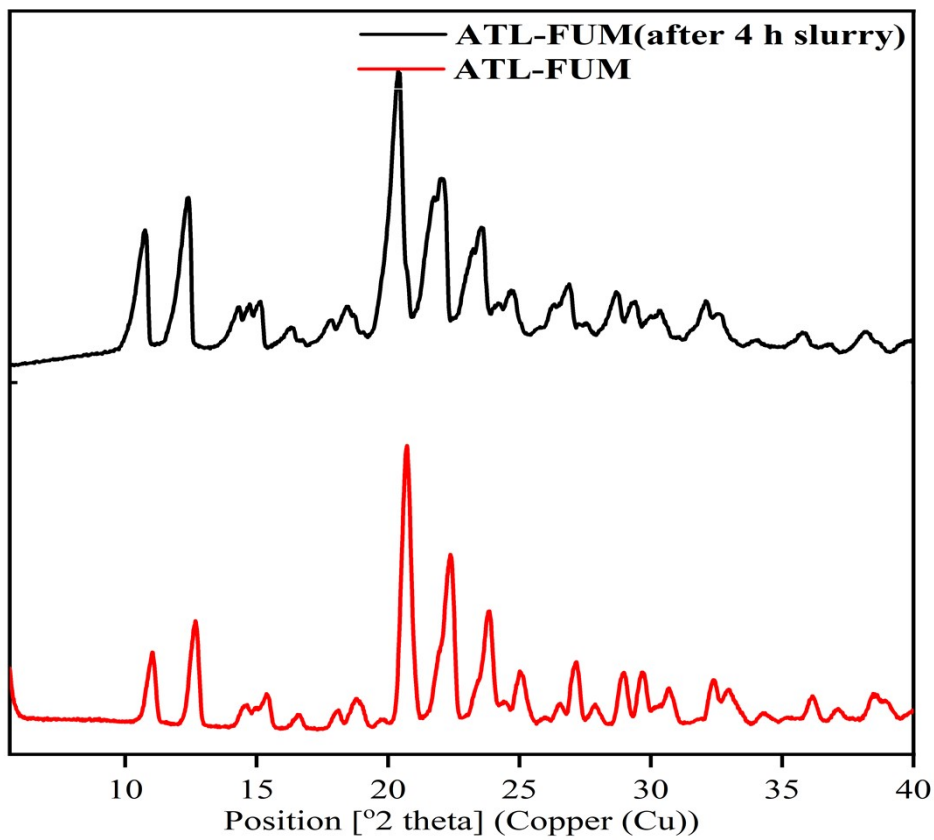

(c)

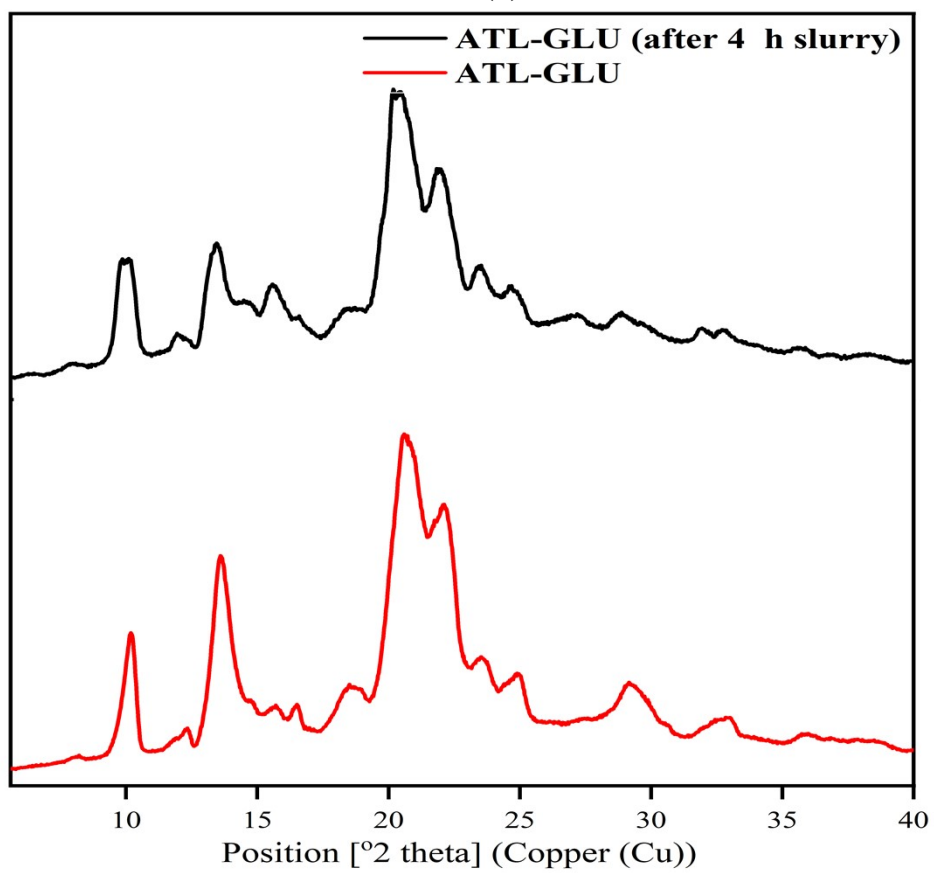

(d)



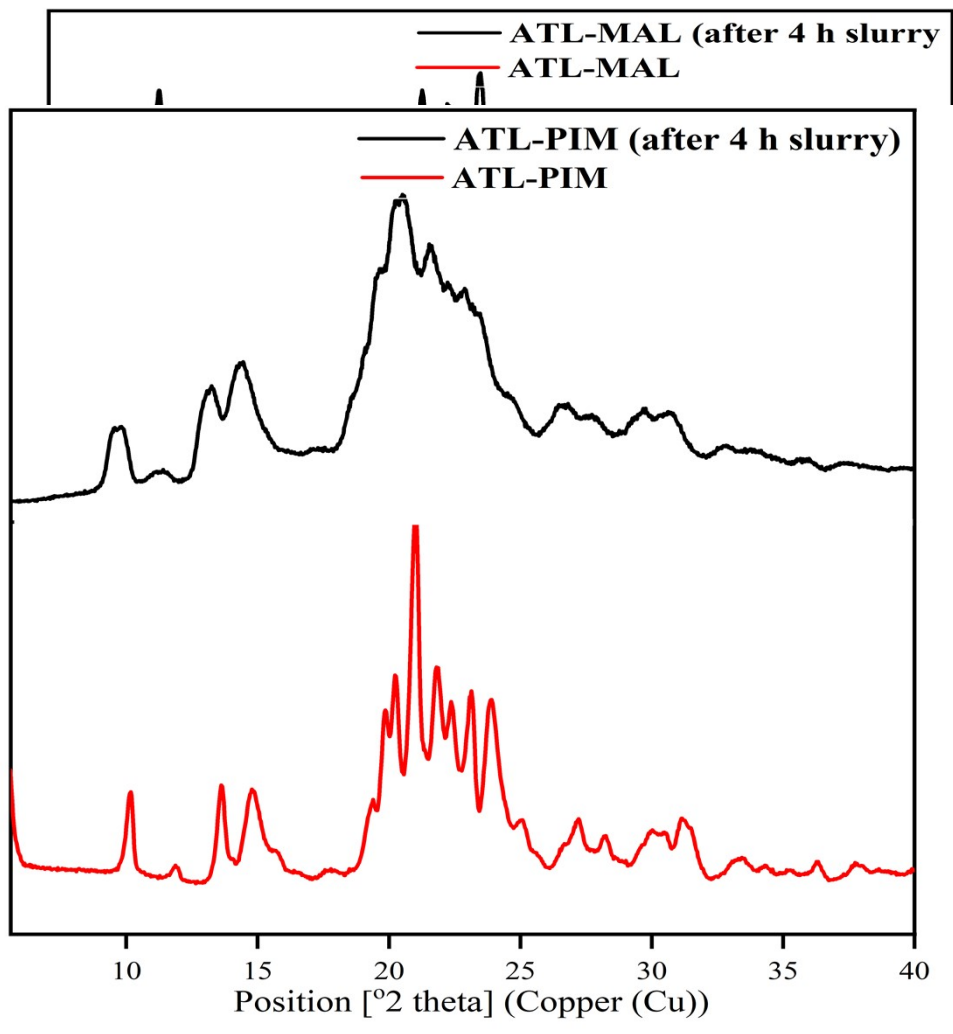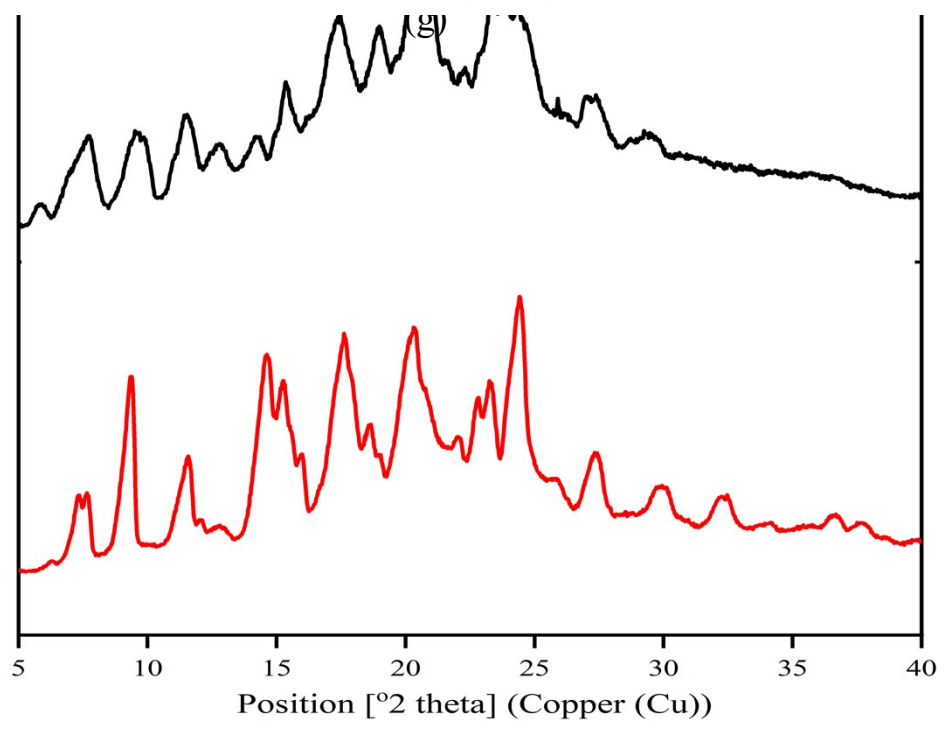

Figure  
PXRD

S6.

(f)

comparison of ATL salts after solubility experiment confirmed that except ATL-OXA salt, others were stable in the aqueous phase (a-g).

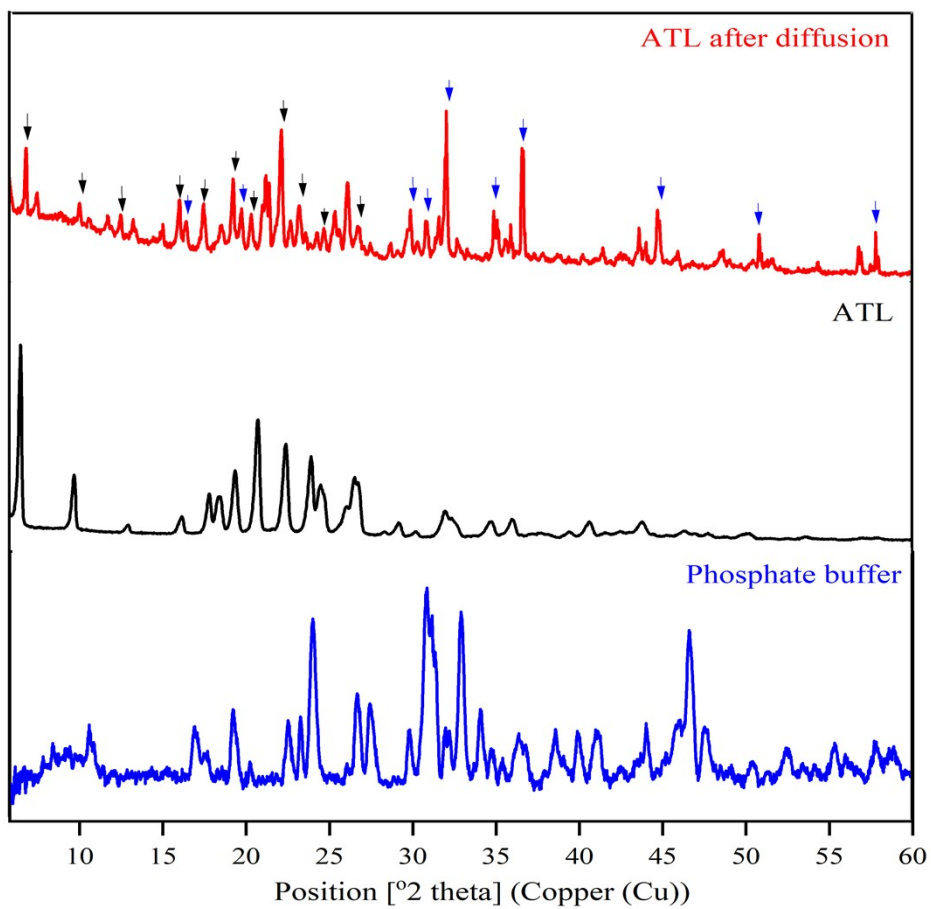

(a)

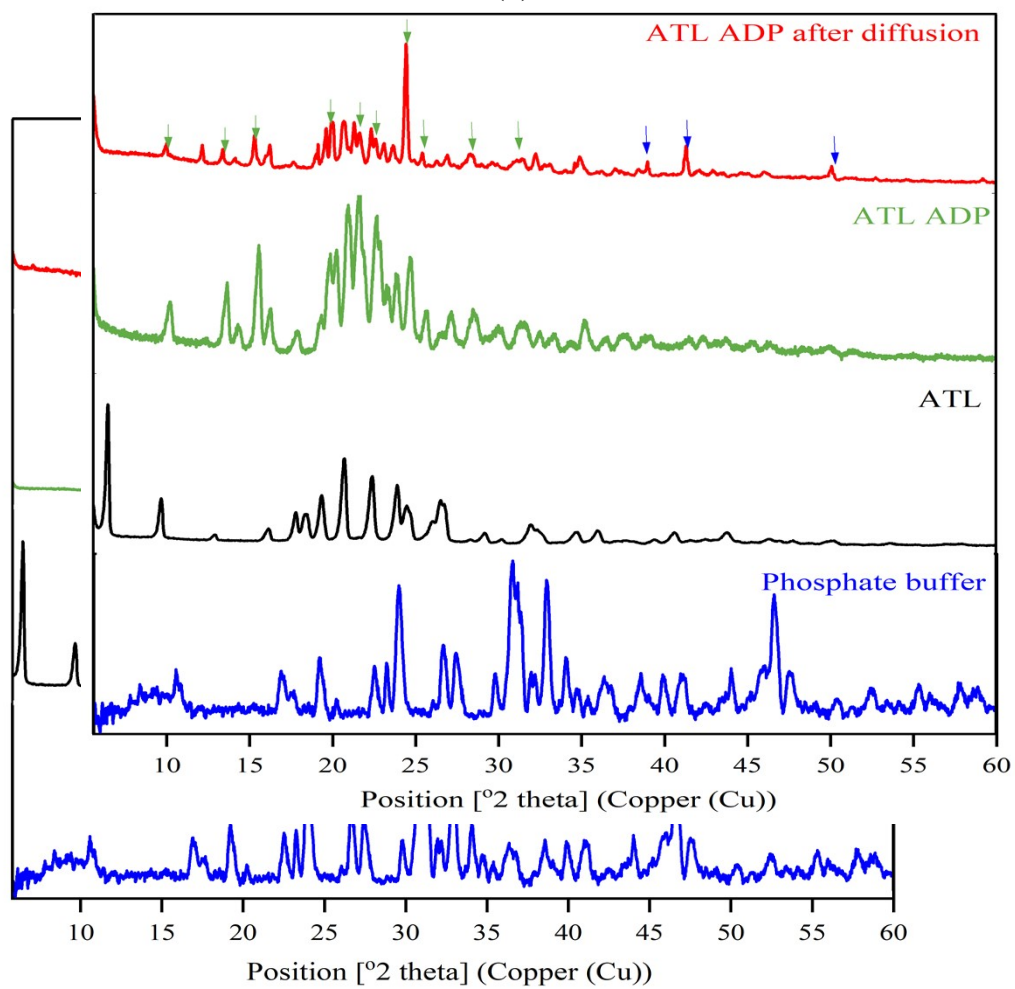

(c)

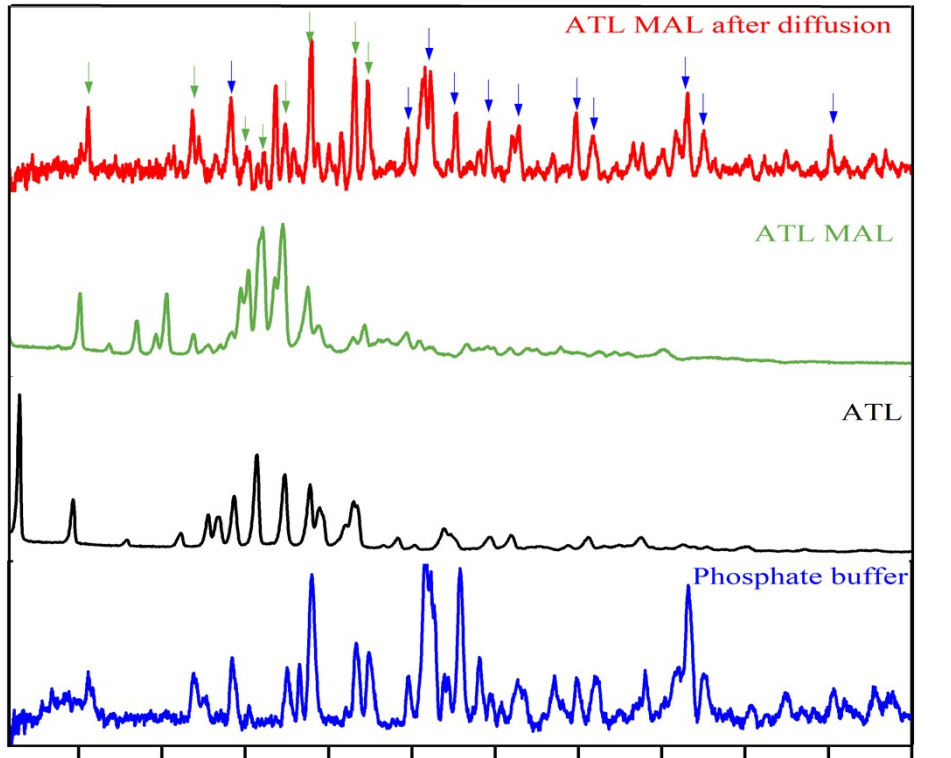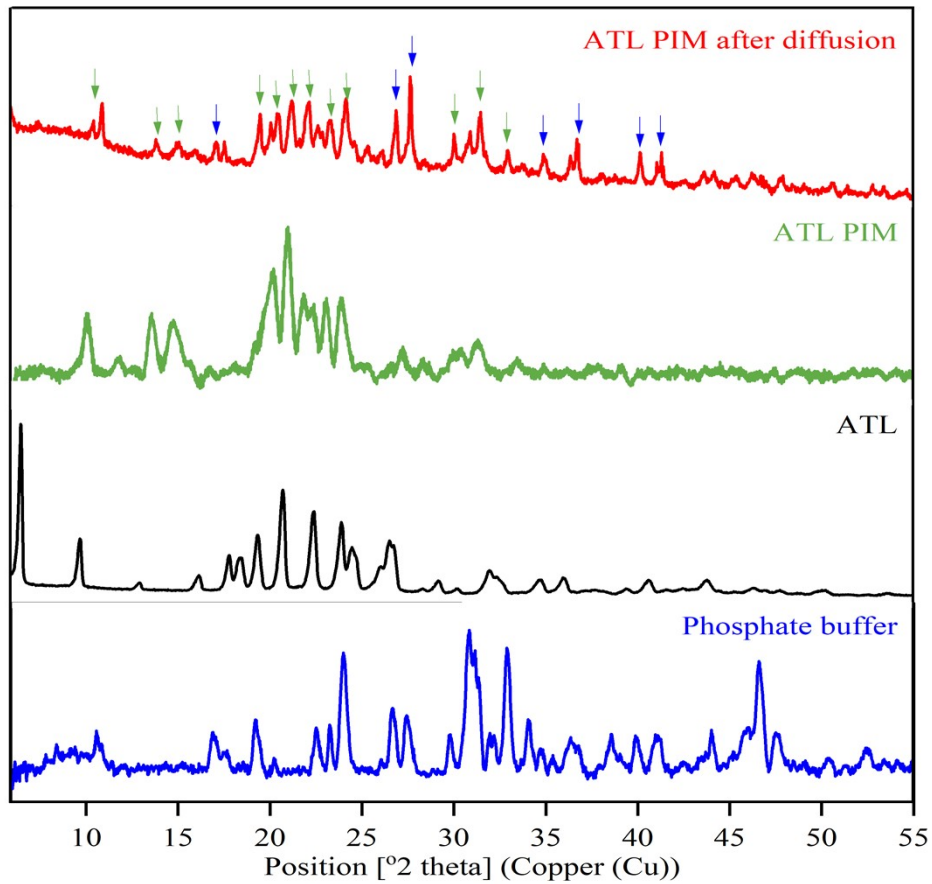

(e)

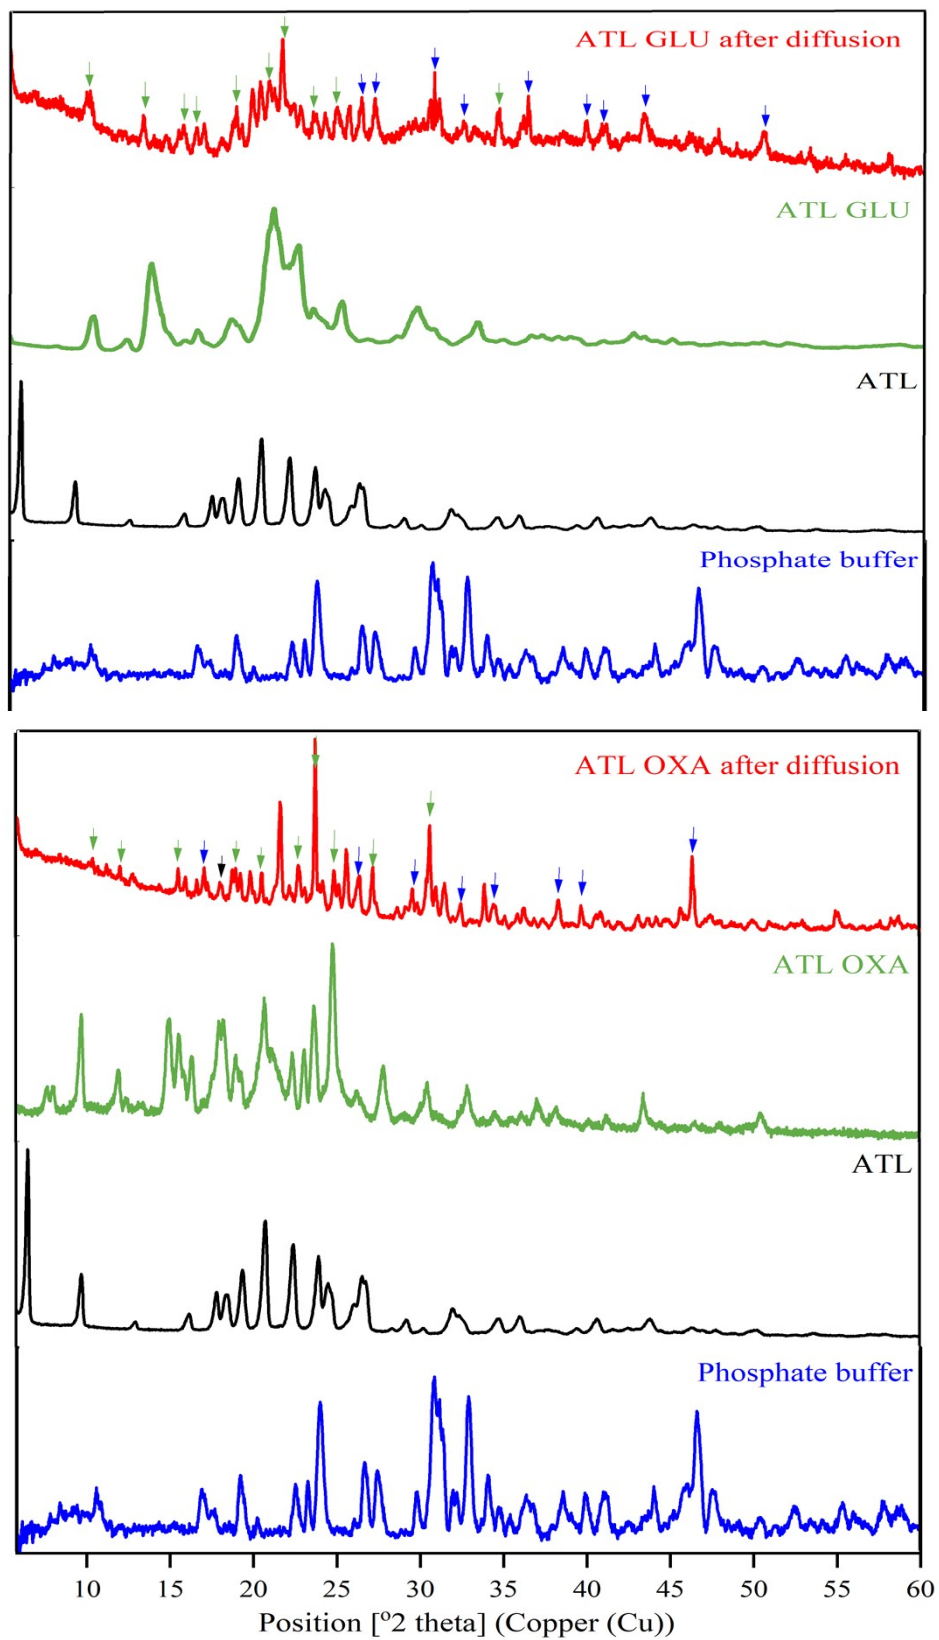

(g)

**Figure S7.** PXRD comparison of ATL and its salts (a-g) after 6h diffusion experiment. Note, additional diffraction peaks correspond to the phosphate buffer salts which appear along with the native drug.(green arrow corresponds to the salt peaks and blue arrow corresponds to the buffer peaks)

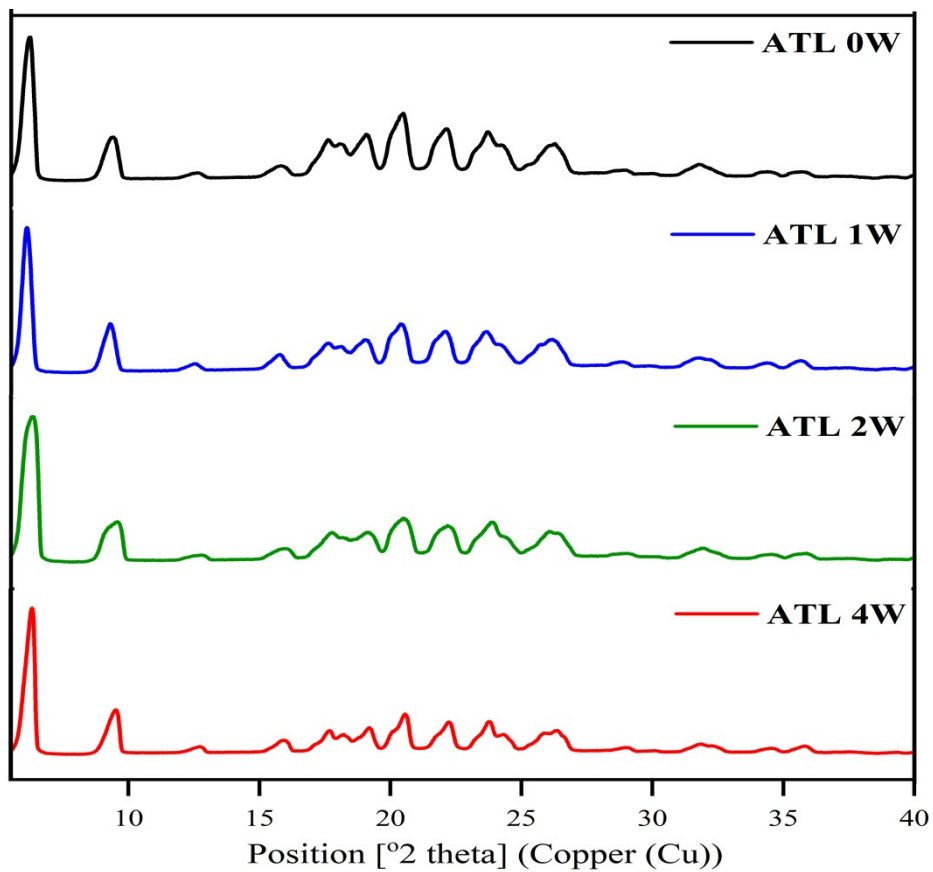

(a)

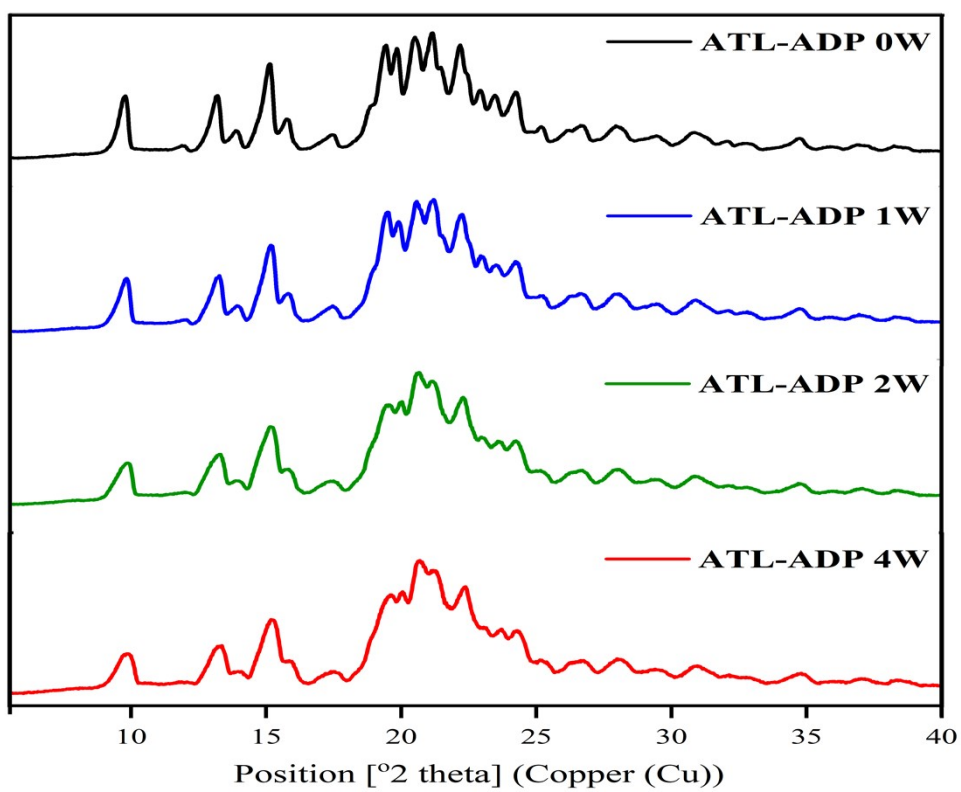

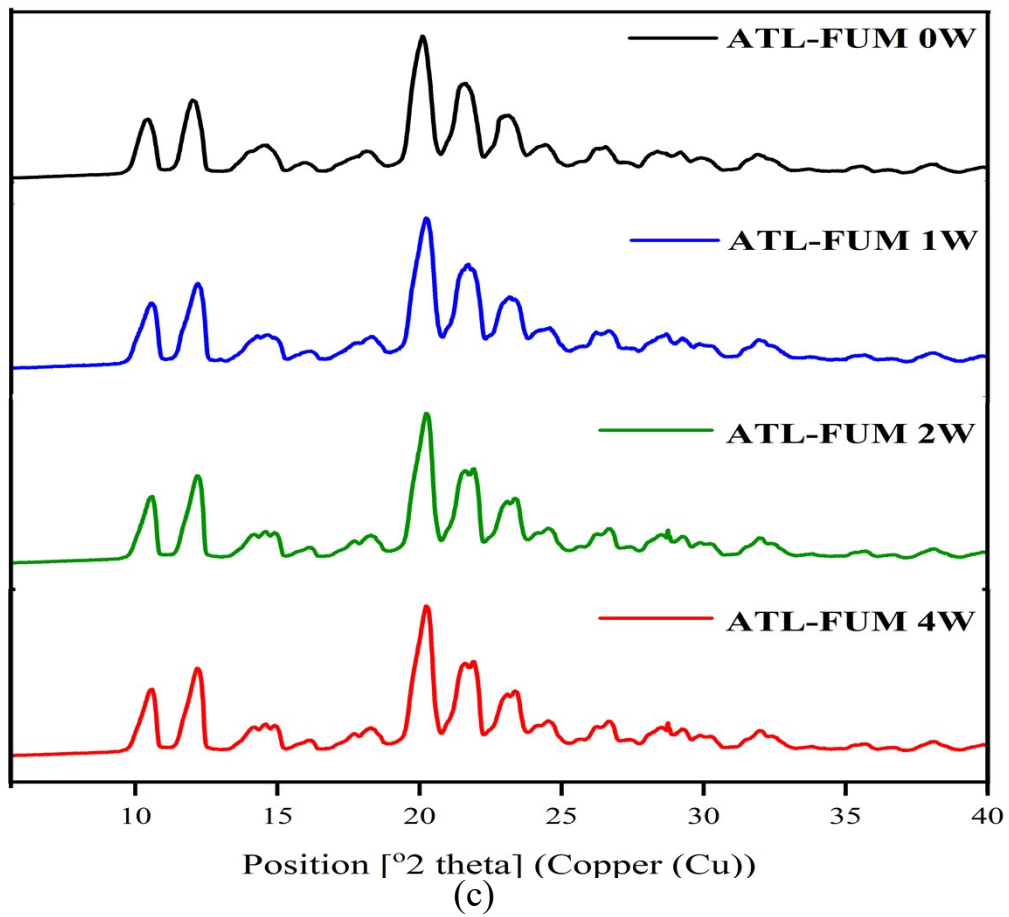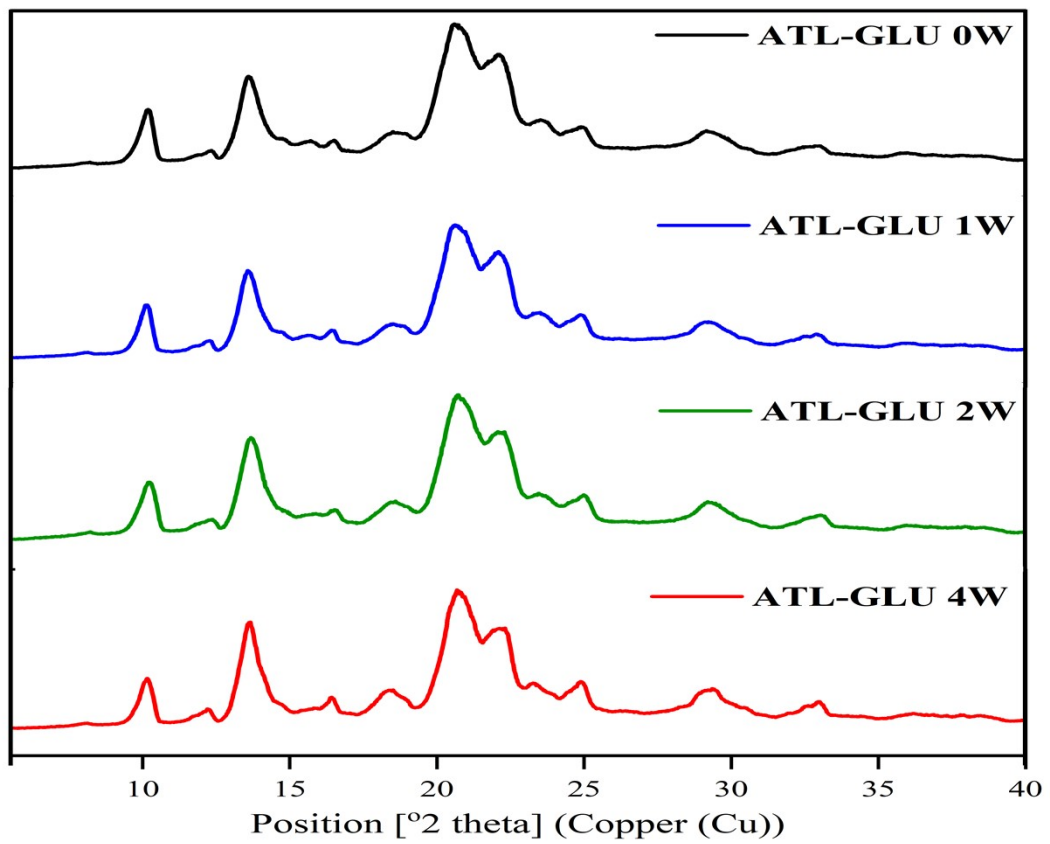

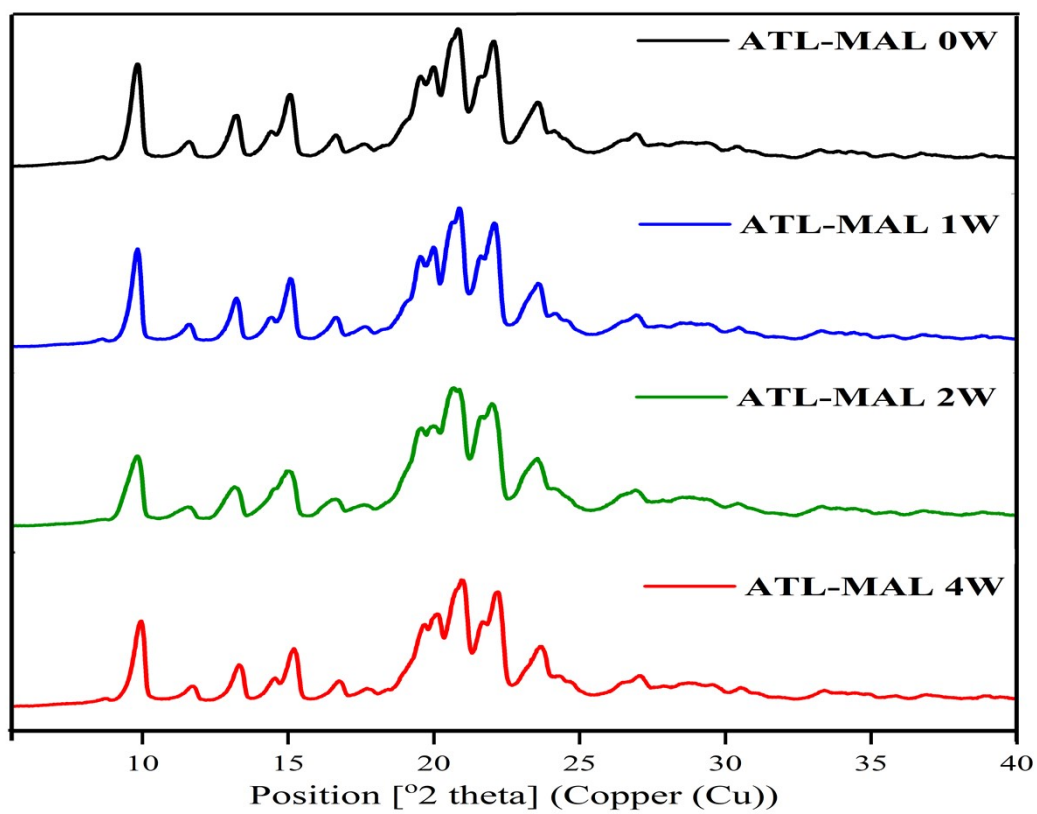

(e)

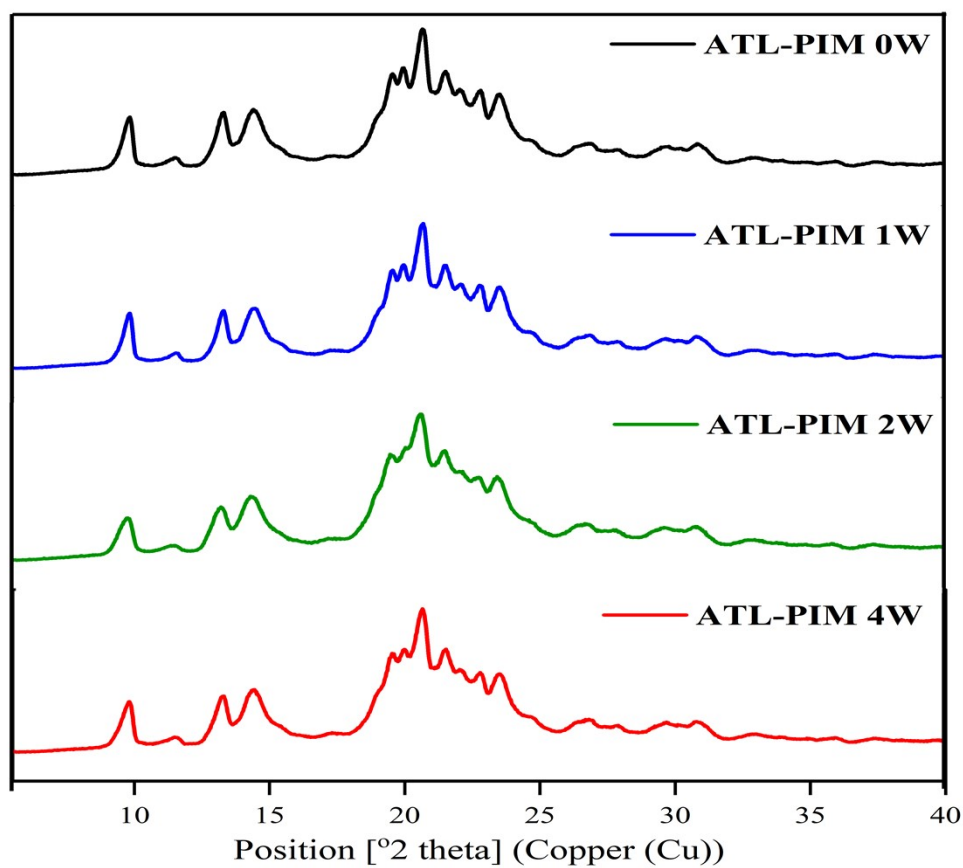

(f)



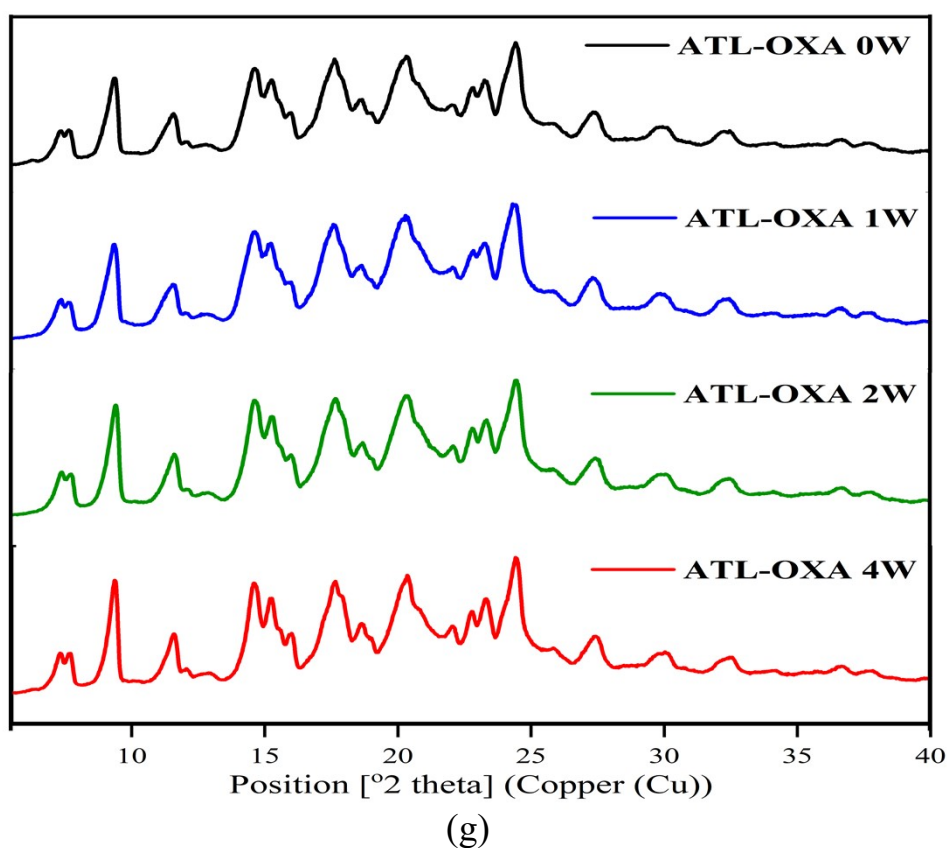

**Figure S8.** PXR D comparison of ATL and its salts exposed to  $35\pm 5$  °C and  $75\pm 5\%$  relative

hu  
 mdi  
 ty  
 for  
 4w  
 that  
 con  
 fir  
 me  
 d  
 thei  
 r  
 phy  
 sica  
 l  
 stab  
 ility  
 (a-  
 g).

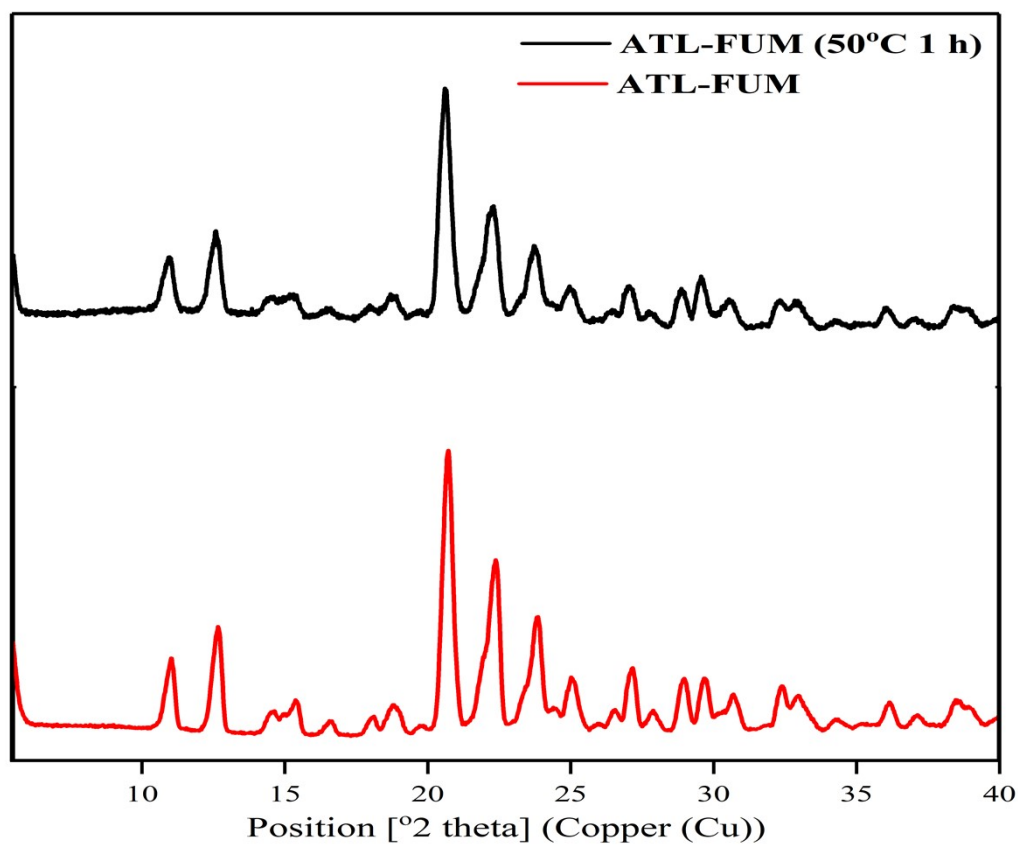

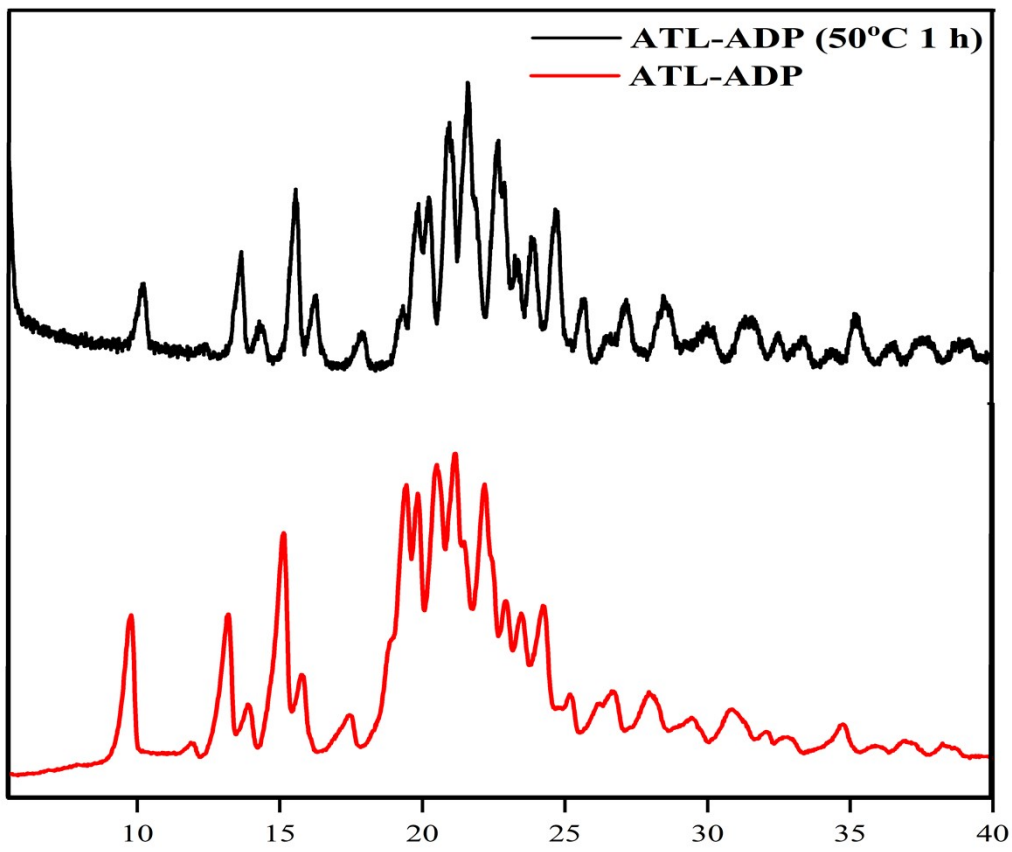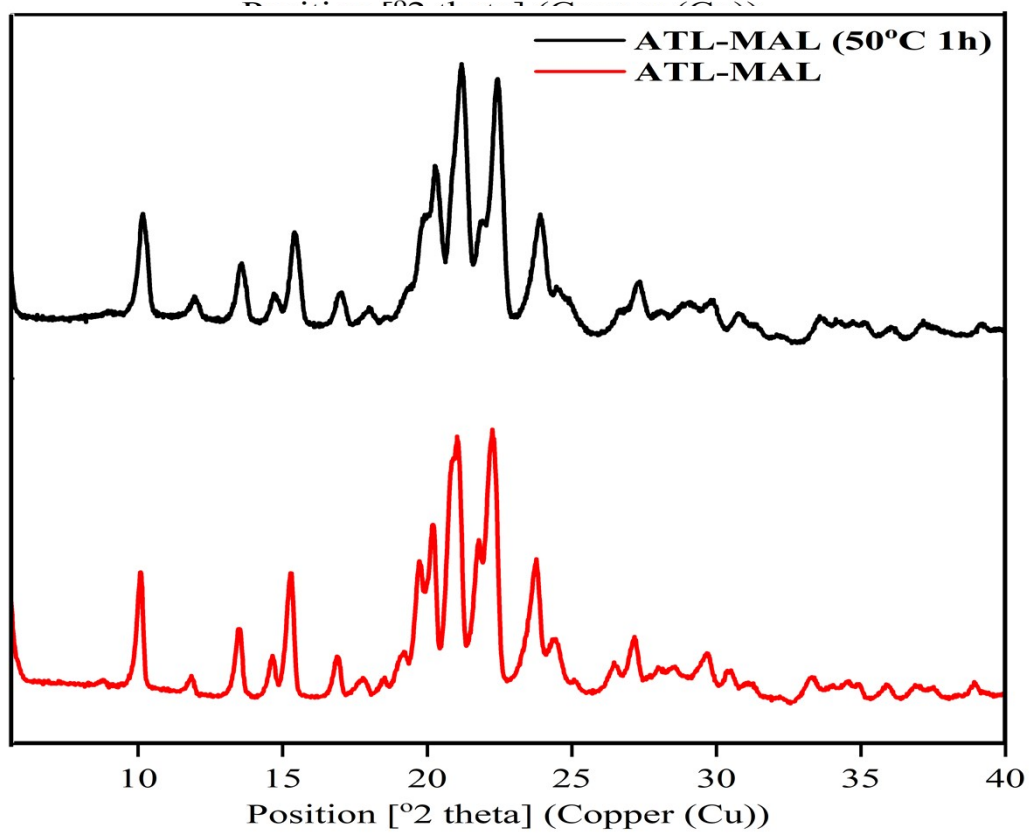

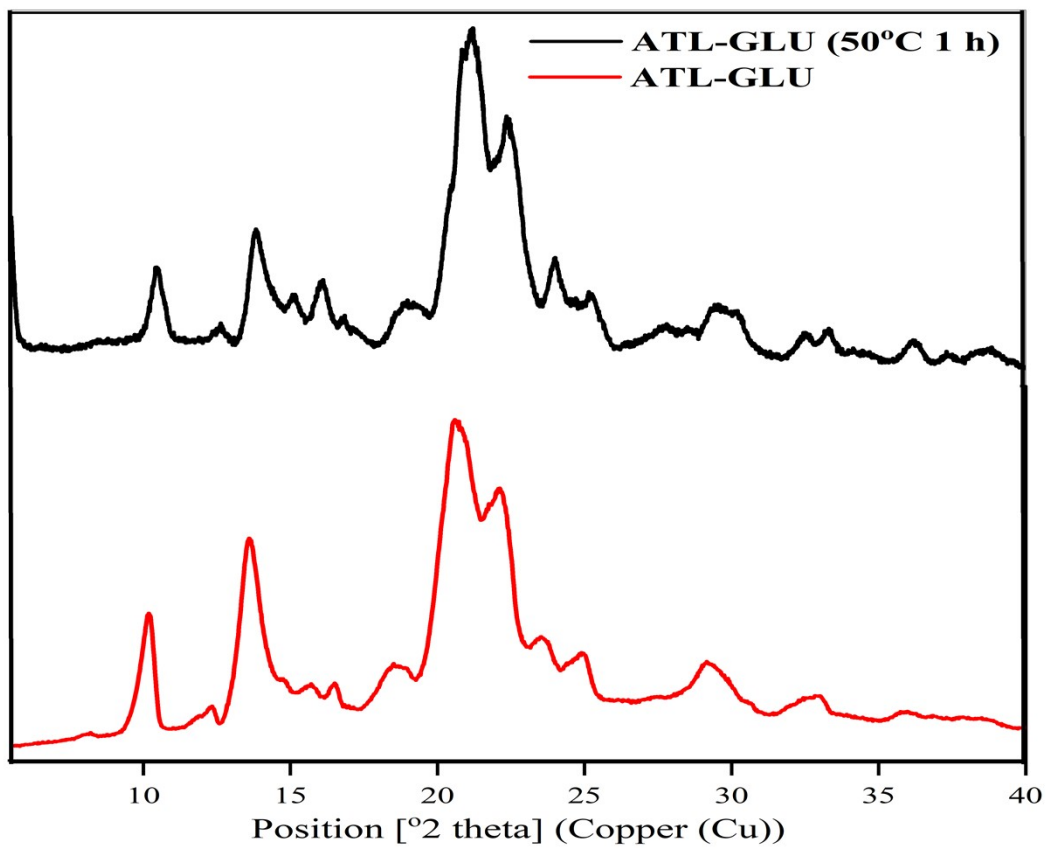

(d)

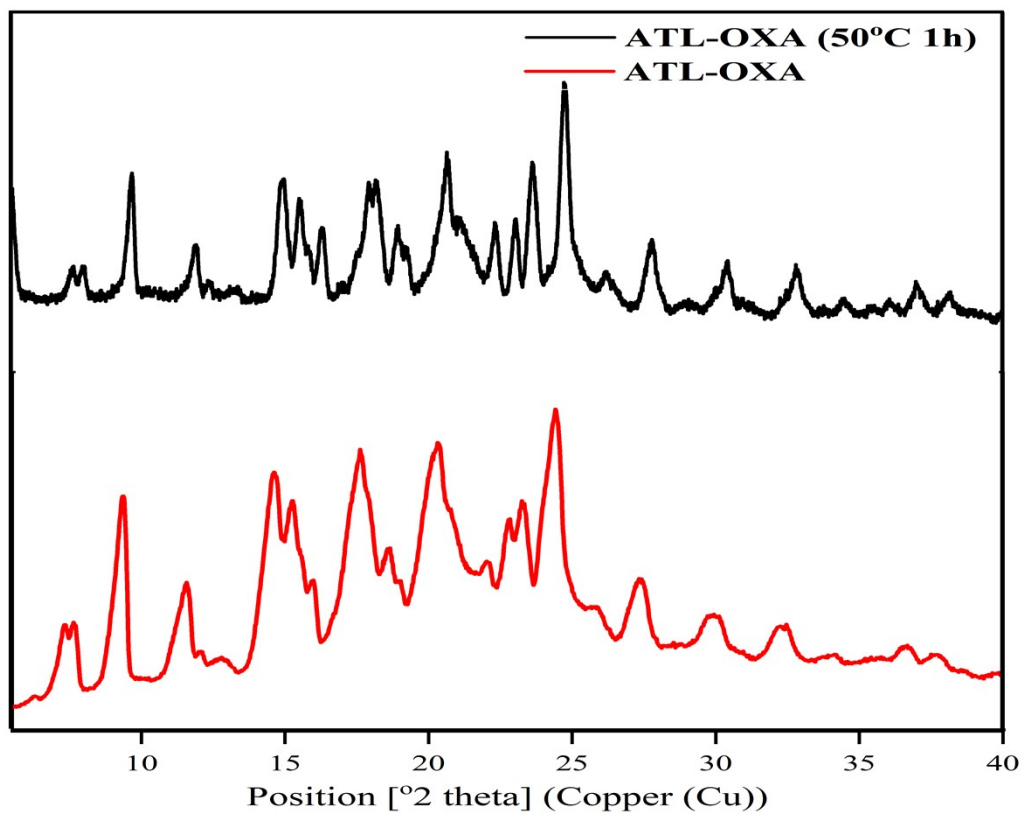

(e)

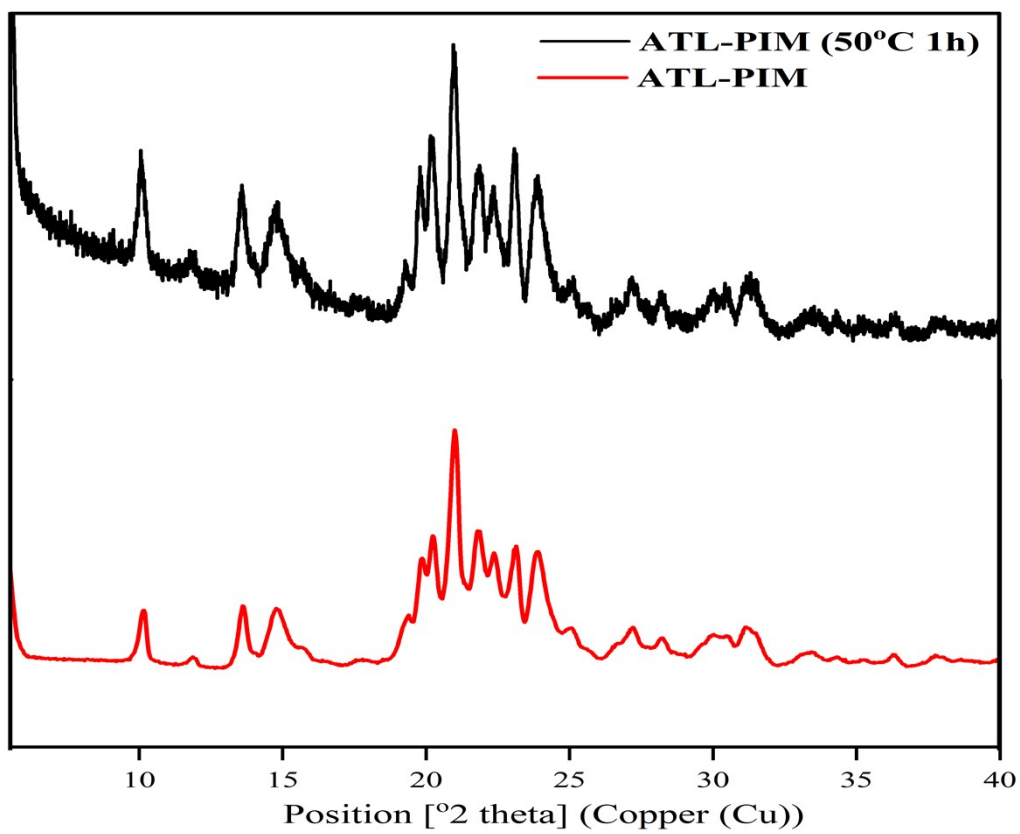

(f)

**Figure S9.** PXRD comparison of ATL salts at 50 °C for 1h confirms their thermal stability (a-f).
